# Supplementary material for: Metabolite-related dietary patterns and the development of islet autoimmunity
Source: PubMed Central journal article supplement (PMC6794249; doi:10.1038/s41598-019-51251-4), 2019-10-15
Supplement: 41598_2019_51251_MOESM1_ESM.pdf [file 41598_2019_51251_MOESM1_ESM.pdf]

## Metabolite-related dietary patterns and the development of islet autoimmunity

Randi K Johnson<sup>1</sup>, Lauren Vanderlinden<sup>2</sup>, Brian C DeFelice<sup>3</sup>, Katerina Kechris<sup>2</sup>, Ulla Uusitalo<sup>4</sup>,  
Oliver Fiehn<sup>3,5</sup>, Marci Sontag<sup>1</sup>, Tessa Crume<sup>1</sup>, Andreas Beyerlein<sup>6,7</sup>, Åke Lernmark<sup>8</sup>, Jorma  
Toppari<sup>9,10</sup>, Anette-G Ziegler<sup>7</sup>, Jin-Xiong She<sup>11</sup>, William Hagopian<sup>12</sup>, Marian Rewers<sup>13</sup>, Beena  
Akolkar<sup>14</sup>, Jeffrey Krischer<sup>4</sup>, Suvi M Virtanen<sup>15,16,17</sup>, and Jill M Norris<sup>1\*</sup>, for the TEDDY Study  
Group<sup>†</sup>

**Supplemental Figure 1—Summary of metabolomics data pre-processing pipeline in all TEDDY metabolomics samples.**

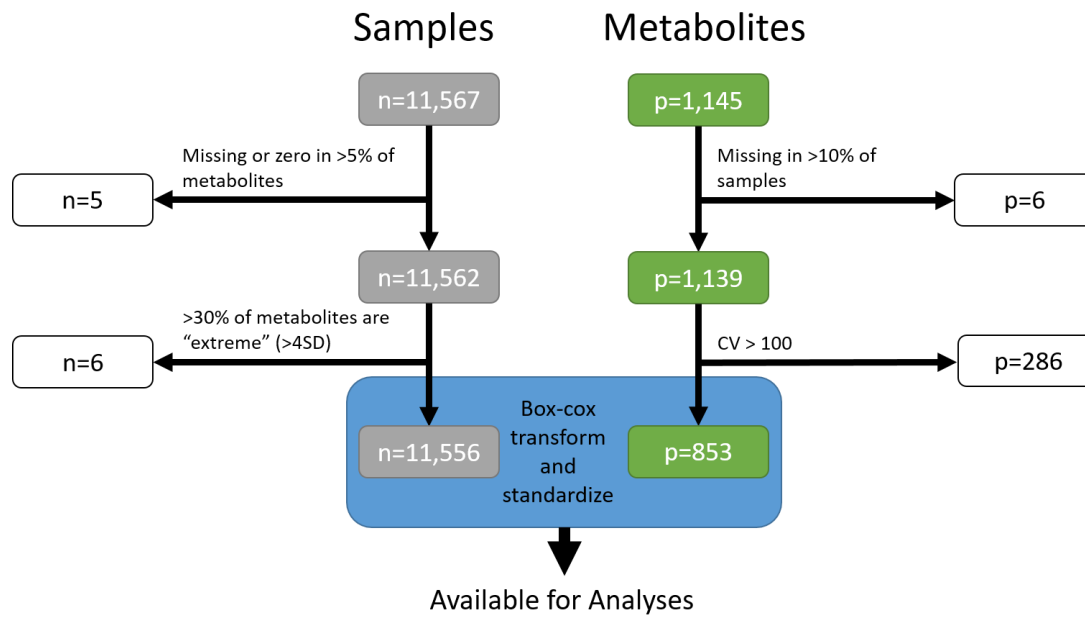

*n=number of samples, p=number of metabolites/features, CV=coefficient of variation, SD=standard deviation*

**Supplemental Table 1: Chemically identified metabolites used in ChemRICH metabolomics set enrichment analysis**

| Variable | Compound Name          | InChiKeys                   | Pubchem ID | SMILES                                                                            |
|----------|------------------------|-----------------------------|------------|-----------------------------------------------------------------------------------|
| t74      | 3-aminoisobutyric acid | QCHPKSFMDHPSNR-UHFFFAOYSA-N | 25201103   | <chem>CC(C[NH3+])C(=O)[O-]</chem>                                                 |
| t147     | Acylcarnitine (C10:1)  | GOOOCIIXFLVRAG-UHFFFAOYSA-N | 53481651   | <chem>C[N+](C)(C)CC(CC(=O)[O-])OC(=O)CCCCCCCC=C</chem>                            |
| t148     | Acylcarnitine (C14:2)  | HXOGMKPCIDSSKJ-NKBLVAAJSA-N | 53481681   | <chem>CCCCCCCC/C=C/C=CC(=O)O[C@@H](CCC(=O)[O-])[N+](C)(C)C</chem>                 |
| t149     | Acylcarnitine (C18:3)  | DFVGGGHKDAHYIU-UHMZJXMFSAN  | 53477821   | <chem>CC/C=C\C/C=C\C/C=C\C/C=C\CCCCCCCC(=O)O[C@@H](CCC(=O)[O-])[N+](C)(C)C</chem> |
| t150     | Acylcarnitine (C8:0)   | CXTATJFJDMJMIY-CYBMUJFWSAN  | 11953814   | <chem>CCCCCCCC(=O)O[C@H](CC(=O)[O-])C[N+](C)(C)C</chem>                           |
| t151     | Acylcarnitine (C8:1)   | YMIVWYONPRZBEJ-LXKVQUBZSAN  | 53481667   | <chem>CCCCC/C=C/C(=O)O[C@@H](CCC(=O)[O-])[N+](C)(C)C</chem>                       |
| t141     | Acylcarnitine C10:0    | LZOSYCMHQXPBFU-UHFFFAOYSA-N | 10245190   | <chem>CCCCCCCCC(=O)OC(CC(=O)[O-])C[N+](C)(C)C</chem>                              |
| t142     | Acylcarnitine C12:0    | FUJLYHJROOYKRA-QGZVFWFLSAN  | 168381     | <chem>CCCCCCCCCCCC(=O)O[C@H](CC(=O)[O-])C[N+](C)(C)C</chem>                       |
| t144     | Acylcarnitine C18:0    | FNPHNLTJNMAEE-UHFFFAOYSA-N  | 6426855    | <chem>CCCCCCCCCCCCCCCC(=O)OC(CC(=O)[O-])C[N+](C)(C)C</chem>                       |
| t145     | Acylcarnitine C18:1    | HIToyGLMAFIRNI-YSESTWPTSAN  | 53477830   | <chem>CCCCC/C=C/CCCCCCCC(=O)O[C@@H](CCC(=O)[O-])[N+](C)(C)C</chem>                |
| t146     | Acylcarnitine C18:2    | MJLXQSQYKZWZCB-DQFWFXSYSAN  | 6450015    | <chem>CCCCC/C=C\C/C=C\C/C=C\CCCCCCCC(=O)O[C@H](CC(=O)[O-])C[N+](C)(C)C</chem>     |
| t73      | adipic acid            | WNLRTRBMVRJNCN-UHFFFAOYSA-N | 196        | <chem>C(CCC(=O)O)CC(=O)O</chem>                                                   |
| t72      | alanine                | QNAYBMKLOCPYGJ-REOHCLBHSA-N | 5950       | <chem>C[C@@H](C(=O)O)N</chem>                                                     |
| t70      | asparagine             | DCXYFEDJOCDNAF-REOHCLBHSA-N | 6267       | <chem>C([C@@H](C(=O)O)N)C(=O)N</chem>                                             |
| t69      | aspartic acid          | CKLJMWTZIZZHCS-REOHCLBHSA-N | 44367445   | <chem>C([C@@H](C(=O)O)[NH3+])C(=O)[O-]</chem>                                     |
| t68      | benzoic acid           | WPYMKLBDIGXBTP-UHFFFAOYSA-N | 20144841   | <chem>[H+].C1=CC=C(C=C1)C(=O)[O-]</chem>                                          |
| t67      | capric acid            | GHVNFZFCNZKVNT-UHFFFAOYSA-N | 2969       | <chem>CCCCCCCCC(=O)O</chem>                                                       |

|      |                  |                             |          |                                                                                                                                  |
|------|------------------|-----------------------------|----------|----------------------------------------------------------------------------------------------------------------------------------|
| t66  | caprylic acid    | WWZKQHOCKIZLMA-UHFFFAOYSA-N | 379      | CCCCCCCC(=O)O                                                                                                                    |
| t433 | CE (16:1)        | HODJWNWCVNUPAQ-FSAOOAOSSA-N | 22833543 | CCCCC/C=C\CCCCCCCC(=O)OC1CC[C@@]2(C3CC[C@@]4([C@H](CCC4C3CC=C2C1)[C@H](C)CCCC(C)C)C                                              |
| t434 | CE (18:1)        | RJECHNNFRHZQKURMUVNZEASA-N  | 5283632  | CCCCCCCC/C=C\CCCCCCCC(=O)O[C@H]1CC[C@@]2([C@H]3CC[C@]4([C@H]([C@@H]3CC=C2C1)CC[C@@H]4[C@H](C)CCCC(C)C)C                          |
| t435 | CE (18:2)        | NAACPBBQTFYQBLJAITQKLSA-N   | 5287939  | CCCCC/C=C\C/C=C\CCCCCCCC(=O)O[C@H]1CC[C@@]2([C@H]3CC[C@]4([C@H]([C@@H]3CC=C2C1)CC[C@@H]4[C@H](C)CCCC(C)C)C                       |
| t436 | CE (18:3)        | FYMCIBHUFSIWCE-WVXFKAQASA-N | 6436907  | CC/C=C\C/C=C\C/C=C\C\CCCCCCCC(=O)O[C@H]1CC[C@@]2([C@H]3CC[C@]4([C@H]([C@@H]3CC=C2C1)CC[C@@H]4[C@H](C)CCCC(C)C)C                  |
| t152 | CE (20:3)        | MLPRJPSMAFZPLA-PJSAOELNSA-N | 53477892 | CCCCC/C=C\C/C=C\C/C=C\C\CCCCCCCC(=O)O[C@H]1CC[C@@]2(C3CC[C@]4(C(C3CC=C2C1)CCC4[C@H](C)CCCC(C)C)C                                 |
| t437 | CE (20:4)        | IMXSFYNMSOULQSBEDFLICRSA-N  | 6479222  | CCCCC/C=C\C/C=C\C/C=C\C\C/C=C\C\CCCC(=O)O[C@H]1CC[C@@]2([C@H]3CC[C@]4([C@H]([C@@H]3CC=C2C1)CC[C@@H]4[C@H](C)CCCC(C)C)C           |
| t438 | CE (20:5)        | XZFUGMCJZFRBKFIKDAPOUSA-N   | 53477889 | CC/C=C\C/C=C\C/C=C\C/C=C\C\C/C=C\C\CCCC(=O)O[C@H]1CC[C@@]2(C3CC[C@]4(C(C3CC=C2C1)CCC4[C@H](C)CCCC(C)C)C                          |
| t439 | CE (22:6)        | VOEVEGPMRIYYKCHNJOWPRISA-N  | 14274978 | CC/C=C\C/C=C\C/C=C\C/C=C\C\C/C=C\C\C/C=C\C\CCC(=O)O[C@H]1CC[C@@]2([C@H]3CC[C@]4([C@H]([C@@H]3CC=C2C1)CC[C@@H]4[C@H](C)CCCC(C)C)C |
| t848 | Ceramide (d33:1) | QBFXCLDNTKBAPQSTSAHMJASA-N  | 52931112 | CCCCCCCCCCCCCCCC(=O)N[C@@H](CO)[C@@H](/C=C/CCCCCCCCCC)O                                                                          |
| t849 | Ceramide (d34:0) | GCGTXOVNNGTPQJHOUSYSJSA-N   | 5283572  | CCCCCCCCCCCCCCCC[C@H]([C@H](CO)NC(=O)CCCCCCCCCCCC)O                                                                              |
| t850 | Ceramide (d34:1) | YDNKGFDKKRUKPYTURZORIXSA-N  | 5283564  | CCCCCCCCCCCCCCCC(=O)N[C@@H](CO)[C@@H](/C=C/CCCCCCCCCCC)O                                                                         |
| t851 | Ceramide (d34:2) | XXWRZIYYFPIQHEXPAOSYCESA-N  | 52931118 | CCCCCCCCCCCCCCCC(=O)N[C@@H](CO)[C@@H](/C=C/CCCCCCCC/C=C\CCC)O                                                                    |
| t852 | Ceramide (d36:1) | MJQIARGPQMNBGTWWUCIAQXSA-N  | 6442676  | CCCCCCCCCCCCCCCC[C@H]([C@H](CO)NC(=O)CCCCC/C=C\CCCCC)O                                                                           |
| t853 | Ceramide (d38:1) | XWBWIAOWSABHFINUKNVZTCSA-N  | 5283566  | CCCCCCCCCCCCCCCCCCCC(=O)N[C@@H](CO)[C@@H](/C=C/CCCCCCCCCCCC)O                                                                    |
| t854 | Ceramide (d39:1) | WYSRACVJQVNCRW-PQPBPFPMSA-N | 11273482 | CCCCCCCCCCCCCCCCCCCC(=O)N[C@@H](CO)[C@@H](/C=C/CCCCCCCC)O                                                                        |
| t855 | Ceramide (d40:0) | SXPRAKSDHOEHIGZESVVUHVSA-N  | 5283575  | CCCCCCCCCCCCCCCCCCCC(=O)N[C@@H](CO)[C@@H](CCCCCCCCCCCC)O                                                                         |
| t856 | Ceramide (d40:1) | KEPQASGDIXEILGLQCRSEXSA-N   | 5283567  | CCCCCCCCCCCCCCCCCCCC(=O)N[C@@H](CO)[C@@H](/C=C/CCCCCCCC)O                                                                        |

|      |                  |                              |          |                                                                   |
|------|------------------|------------------------------|----------|-------------------------------------------------------------------|
| t857 | Ceramide (d40:2) | HILTUFAERVOALR-MQXYEJFFSA-N  | 52931123 | CCCCCCCCCCCCCCCCCCCC(=O)N[C@@H](CO)[C@@H](/C=C/CCCCCCCC/C=C\C/C)O |
| t859 | Ceramide (d42:0) | BPLYVSYBPLDOA-WVILEFPPSA-N   | 5283577  | CCCCCCCCCCCCCCCCCCCC(=O)N[C@@H](CO)[C@@H](CCCCCCCCCCCCCCCC)O      |
| t860 | Ceramide (d42:1) | ZJVVOYPTFQEGPH-AUTSUKAISA-N  | 5283571  | CCCCCCCCCCCCCCCCCCCC(=O)N[C@@H](CO)[C@@H](/C=C/CCCCCCCCCCCC)O     |
| t861 | Ceramide (d42:2) | VJSBNBOSZJDKB-KPEYJIHVSA-N   | 5283568  | CCCCCCCCCCCCCCCC/C=C/[C@H]([C@H](CO)NC(=O)CCCCCCCCCCCC/C=C\C/C)O  |
| t863 | Ceramide (d43:1) | QHPYSHVSWAOLHS-PVNBSDFKSA-N  | 9547202  | CCCCCCCCCCCCCCCCCCCC(=O)N[C@@H](CO)[C@@H](/C=C/CCCCCCCCCCCC)O     |
| t864 | Ceramide (d44:1) | CJROVRTUSFQVMR-GVOPMEMSSA-N  | 5283570  | CCCCCCCCCCCCCCCCCCCC(=O)N[C@@H](CO)[C@@H](/C=C/CCCCCCCCCCCC)O     |
| t64  | citramalic acid  | XFTRTWQBIOMVPK-UHFFFAOYSA-N  | 1081     | CC(CC(=O)O)(C(=O)O)O                                              |
| t63  | creatinine       | DDRJAANPRJIHGJ-UHFFFAOYSA-N  | 588      | CN1CC(=O)N=C1N                                                    |
| t62  | cystine          | LEVWYRKDKASIDU-UHFFFAOYSA-N  | 24798687 | C(C(C(=O)[O-])[NH3+])SSCC(C(=O)[O-])[NH3+]                        |
| t61  | deoxypentitol    | FJGNTEKSQVNV TJ-UHFFFAOYSA-N | 270738   | CC(C(C(CO)O)O)O                                                   |
| t444 | DG (32:1)        | XEQQGHISHUGMIP-ASUORMEESA-N  | 14275341 | CCCCCCCCCCCCCCCC(=O)OC[C@H](CO)OC(=O)CCCCCCC/C=C\C/C              |
| t445 | DG (34:1)        | YEJYLHKQOBOSCP-OZKTZCCCSA-N  | 5282283  | CCCCCCCCCCCCCCCC(=O)OC[C@H](CO)OC(=O)CCCCCCC/C=C\C/C              |
| t156 | DG (36:1)        | SAEPUUXWQQNLGN-LVVMQYBKSA-N  | 6443547  | CCCCCCCCCCCCCCCC(=O)OC[C@H](CO)OC(=O)CCCCCCC/C=C\C/C              |
| t447 | DG (36:2)        | AFSHUZFNMVJNKX-LLWMBOQKSA-N  | 9543716  | CCCCCCCC/C=C\C/C(=O)OC[C@H](CO)OC(=O)CCCCCCC/C=C\C/C              |
| t448 | DG (36:3)        | BLZVZPYMHLXLHG-JOBMVARSSA-N  | 9543722  | CCCCCCCC/C=C\C/C(=O)OC[C@H](CO)OC(=O)CCCCCCC/C=C\C/C              |
| t157 | DG (36:4)        | MQGBAQLIFKSMEM-ZHARMHCNSA-N  | 9543729  | CCCC/C=C\C/C(=O)OC[C@H](CO)OC(=O)CCCCCCC/C=C\C/C                  |
| t159 | DG (36:5)        | PGXBELQFNRPKBC-WBVIKXWMSA-N  | 9543737  | CCCC/C=C\C/C(=O)OC[C@H](CO)OC(=O)CCCCCCC/C=C\C/C                  |
| t160 | DG (38:0)        | IQNYOCFHHRCKMY-KDXMTYKHSAN   | 53478362 | CCCCCCCCCCCCCCCC(=O)OC[C@H](CO)OC(=O)CCCCCCCCCCCC                 |
| t161 | DG (38:3)        | ADXAWIUCSQOAS-SMJZOZILHSA-N  | 9543766  | CCCCCCCC/C=C\C/C(=O)OC[C@H](CO)OC(=O)CCCCCCCC/C=C\C/C             |



|      |                                    |                             |          |                                                                                                                                                             |
|------|------------------------------------|-----------------------------|----------|-------------------------------------------------------------------------------------------------------------------------------------------------------------|
| t870 | GlcCer(d14:1(4E)/20:0(2OH))        | YYILQTLJZBSOCA-IMJQGFQJSA-N | 70699246 | CCCCCCCCCCCCCCCCCCCC(C(=O)N[C@@H](CO[C@H]1C(C([C@@H]([C@H](O1)CO)O)O)[C@@H](/C=C/CCCCCCCC)O)O                                                               |
| t57  | gluconic acid                      | RGHNJXZEOKUKBD-QTBDOELSSA-N | 6857417  | C([C@@H]([C@H]([C@@H]([C@@H](C(=O)O)O)O)O)O)O                                                                                                               |
| t56  | glucose                            | WQZGKKKJIJFFOK-VFUOTHLCSA-N | 64689    | C([C@@H]1[C@H]([C@@H]([C@H]([C@@H](O1)O)O)O)O)O                                                                                                             |
| t55  | glutamine                          | ZDXPYRJPNDTMRX-VKHMYHEASA-N | 5961     | C(CC(=O)N)[C@@H](C(=O)O)N                                                                                                                                   |
| t54  | glutaric acid                      | JFCQEDHGNNZCLN-UHFFFAOYSA-N | 23322899 | [H+].[H+].C(CC(=O)[O-])CC(=O)[O-]                                                                                                                           |
| t53  | glycerol                           | PEDCQBHIVMGVHV-UHFFFAOYSA-N | 753      | C(C(CO)O)O                                                                                                                                                  |
| t52  | glycine                            | DHMQDGOQFOQNFH-UHFFFAOYSA-N | 5257127  | C(C(=O)[O-])[NH3+]                                                                                                                                          |
| t51  | heptadecanoic acid                 | KEMQGTRYUADPNZ-UHFFFAOYSA-N | 10465    | CCCCCCCCCCCCCCCCCCCC(=O)O                                                                                                                                   |
| t50  | hexitol                            | FBPFZTCFMRRESA-UHFFFAOYSA-N | 453      | C(C(C(C(C(CO)O)O)O)O)O                                                                                                                                      |
| t49  | histidine                          | HNDVDQJCIGZPNO-YFKPBYRVSA-N | 6274     | C1=C(NC=N1)C[C@@H](C(=O)O)N                                                                                                                                 |
| t47  | hydroxylamine                      | AVXURJPOCDRRFD-UHFFFAOYSA-N | 787      | NO                                                                                                                                                          |
| t46  | indole-3-acetate                   | SEOVTRFCIGRIMH-UHFFFAOYSA-N | 802      | C1=CC=C2C(=C1)C(=CN2)CC(=O)O                                                                                                                                |
| t45  | indoxyl sulfate                    | BXFFHSIDQOFMLE-UHFFFAOYSA-N | 10258    | C1=CC=C2C(=C1)C(=CN2)OS(=O)(=O)O                                                                                                                            |
| t44  | isoleucine                         | AGPKZVBTJJNPAG-WHFBIAKZSA-N | 6306     | CC[C@H](C)[C@@H](C(=O)O)N                                                                                                                                   |
| t43  | isothreonic acid                   | JPIJQSOTBSSVTP-GBXIISLDSA-N | 151152   | C([C@H]([C@@H](C(=O)O)O)O)O                                                                                                                                 |
| t42  | lactic acid                        | JVTAAEKCFNVCJ-UHFFFAOYSA-N  | 19789253 | [H+].CC(C(=O)[O-])O                                                                                                                                         |
| t455 | Lactosylceramide (d18:1/24:1(15Z)) | MKOKWBRPIBQYJJ-LWQSSKHKSA-N | 20057309 | CCCCCCCCCCCCCCCC/C=C/[C@H]([C@H](CO[C@H]1C([C@H]([C@@H]([C@H](O1)CO)O)[C@@H]2[C@@H]([C@H]([C@H]([C@H](O2)CO)O)O)O)O)O)O)O)NC(=O)CCCCCCCCCCCC/C=C\CCCCCCCC)O |
| t41  | lauric acid                        | POULHZVOKOAJMA-UHFFFAOYSA-N | 3893     | CCCCCCCCCCCCCCCC(=O)O                                                                                                                                       |
| t40  | leucine                            | ROHFNLRQFUQHCH-YFKPBYRVSA-N | 6106     | CC(C)C[C@@H](C(=O)O)N                                                                                                                                       |

|      |               |                              |          |                                                                                   |
|------|---------------|------------------------------|----------|-----------------------------------------------------------------------------------|
| t39  | linoleic acid | OYHQOLUKZRVURQ-HZJYTRNSA-N   | 5280450  | CCCCC/C=C\C/C=C\CCCCCCCC(=O)O                                                     |
| t521 | LPC (14:0)    | VXUOFDJKYGDUJI-OAQYLSRUSA-N  | 460604   | CCCCCCCCCCCCCCCC(=O)OC[C@H](COP(=O)([O-])OCC[N+](C)(C)C)O                         |
| t163 | LPC (15:0)    | RJZVWDTYEWCUAR-JOCHJYFZSA-N  | 24779458 | CCCCCCCCCCCCCCCC(=O)OC[C@H](COP(=O)([O-])OCC[N+](C)(C)C)O                         |
| t871 | LPC (16:0)    | ASWBNKHCZGQVJV-HSZRJFAPSA-N  | 460602   | CCCCCCCCCCCCCCCC(=O)OC[C@H](COP(=O)([O-])OCC[N+](C)(C)C)O                         |
| t522 | LPC (16:1)    | LFUDDCMNKWEORN-ZXEGGCGDSA-N  | 24779461 | CCCCC/C=C\CCCCCCCC(=O)OC[C@H](COP(=O)([O-])OCC[N+](C)(C)C)O                       |
| t166 | LPC (17:1)    | LPMGFNAQZPADDZ-FJIRUFBSA-N   | 24779451 | CCCCC/C=C\CCCCCCCC(=O)OC[C@H](COP(=O)([O-])OCC[N+](C)(C)C)O                       |
| t523 | LPC (18:0)    | IHNKQIMGVNPMTC-RUZDIDTESA-N  | 497299   | CCCCCCCCCCCCCCCC(=O)OC[C@H](COP(=O)([O-])OCC[N+](C)(C)C)O                         |
| t525 | LPC (18:1)    | YAMUFBLWGGFFICM-PTGWMXDISA-N | 16081932 | CCCCC/C=C\CCCCCCCC(=O)OC[C@H](COP(=O)([O-])OCC[N+](C)(C)C)O                       |
| t872 | LPC (18:2)    | SPJFYJXNPEZDW-FTJOPAKQSA-N   | 11005824 | CCCCC/C=C\C/C=C\CCCCCCCC(=O)OC[C@H](COP(=O)([O-])OCC[N+](C)(C)C)O                 |
| t170 | LPC (18:3)    | WKQNRKYKYCKESD-YVHLTTHBSA-N  | 24779469 | CC/C=C\C/C=C\C/C=C\CCCCCCCC(=O)OC[C@H](COP(=O)([O-])OCC[N+](C)(C)C)O              |
| t171 | LPC (20:0)    | UATOAILWGVYRQS-HHHXNRCGSA-N  | 24779473 | CCCCCCCCCCCCCCCC(=O)OC[C@H](COP(=O)([O-])OCC[N+](C)(C)C)O                         |
| t526 | LPC (20:1)    | GJTDRNFWDIPARY-GTPZACKGSA-N  | 24779475 | CCCCCCCCC/C=C\CCCCCCCC(=O)OC[C@H](COP(=O)([O-])OCC[N+](C)(C)C)O                   |
| t527 | LPC (20:2)    | YYQVCMMXPIJVHY-ZOIJLGJPSA-N  | 52924053 | CCCCC/C=C\C/C=C\CCCCCCCC(=O)OC[C@H](COP(=O)([O-])OCC[N+](C)(C)C)O                 |
| t528 | LPC (20:3)    | BBNHCUBQEJHIG-FZZJNMCHSA-N   | 52924055 | CCCCC/C=C\C/C=C\C/C=C\CCCCCCCC(=O)OC[C@H](COP(=O)([O-])OCC[N+](C)(C)C)O           |
| t175 | LPC (20:4)    | GOMVPVRDBLLHQC-VEJNOCSESA-N  | 53480469 | CC/C=C\C/C=C\C/C=C\C/C=C\CCCCCCCC(=O)OC[C@H](COP(=O)([O-])OCC[N+](C)(C)C)O        |
| t176 | LPC (20:5)    | PDIGSOAOQXRDU-WJPZTBRDSA-N   | 11757087 | CC/C=C\C/C=C\C/C=C\C/C=C\C/C=C\CCCC(=O)OC[C@H](COP(=O)([O-])OCC[N+](C)(C)C)O      |
| t177 | LPC (22:4)    | ZOJBSSVHFSBHMP-JJJSWPRASA-N  | 52924039 | CCCCC/C=C\C/C=C\C/C=C\C/C=C\CCCC(=O)OC[C@H](COP(=O)([O-])OCC[N+](C)(C)C)O         |
| t529 | LPC (22:5)    | YBUXFQUGNPBZPS-YNBHEIDWSA-N  | 53480473 | CCCCC/C=C\C/C=C\C/C=C\C/C=C\C/C=C\CCC(=O)OC[C@H](COP(=O)([O-])OCC[N+](C)(C)C)O    |
| t179 | LPC (22:6)    | LSOWKZULVQWMLY-APPDJCNMSA-N  | 10415542 | CC/C=C\C/C=C\C/C=C\C/C=C\C/C=C\C/C=C\CCC(=O)OC[C@H](COP(=O)([O-])OCC[N+](C)(C)C)O |



|      |                              |                              |          |                                                                            |
|------|------------------------------|------------------------------|----------|----------------------------------------------------------------------------|
| t180 | LPC (o-16:0)                 | VLBPIWYTPAXCFJ-DEOSSOPVSA-N  | 10480367 | CCCCCCCCCCCCCCCCOC[C@@H](COP(=O)([O-])OCC[N+](C)(C)C)O                     |
| t181 | LPC (p-16:0) or LPC (o-16:1) | HTZINLFNXLXRBC-CQLBIITFSA-N  | 10917802 | CCCCCCCCCCCCCCCC/C=C\OC[C@H](COP(=O)([O-])OCC[N+](C)(C)C)O                 |
| t530 | LPE (16:0)                   | CKPBBEOJHAPPBT-HXUWFJFHSA-N  | 53480922 | CCCCCCCCCCCCCCCC(=O)O[C@H](CO)COP(=O)(O)OCCN                               |
| t531 | LPE (18:2)                   | DBHKHNGBVGWQJE-USWSLJGRSA-N  | 52925130 | CCCC/C=C\C/C=C\C\CCCCCCCC(=O)OC[C@H](COP(=O)(O)OCCN)O                      |
| t532 | LPE (20:4)                   | JPNPIRVRGLGTRE-YSKCIPFOSA-N  | 53480952 | CC/C=C\C/C=C\C/C=C\C/C=C\C\CCCCCCCC(=O)OC[C@H](COP(=O)(O)OCCN)O            |
| t533 | LPE (22:6)                   | XEVRBOQZSXWGQO-PAUXXPOVSA-N  | 52925132 | CC/C=C\C/C=C\C/C=C\C/C=C\C/C=C\C/C=C\C\CCC(=O)OC[C@H](COP(=O)(O)OCCN)O     |
| t38  | lysine                       | KDXKERNBIXSRK-YFKPBYRVSA-N   | 5962     | C(CCN)C[C@@H](C(=O)O)N                                                     |
| t37  | lyxitol                      | HEBKCHPVOIAQTA-IMJSIDKUSA-N  | 439255   | C([C@@H](C([C@H](CO)O)O)O)O                                                |
| t36  | malic acid                   | BJEPYKJPYRNKOW-UHFFFAOYSA-N  | 20130941 | [H+].[H+].C(C(C(=O)[O-])O)C(=O)[O-]                                        |
| t35  | methanolphosphate            | CAAULPUQFIIOTL-UHFFFAOYSA-N  | 13130    | COP(=O)(O)O                                                                |
| t34  | methionine                   | FFEARJCKVFRZRR-BYPYZUCNSA-N  | 6137     | CSCC[C@@H](C(=O)O)N                                                        |
| t32  | myo-inositol                 | CDAISMWEOUEBRE-UHFFFAOYSA-N  | 892      | C1(C(C(C(C(C1O)O)O)O)O)O                                                   |
| t31  | N-methylalanine              | GDFAOVXKHJXLEI-VKHYHEASA-N   | 5288725  | C[C@@H](C(=O)O)NC                                                          |
| t30  | nornicotine                  | MYKUKUCHPMASKF-UHFFFAOYSA-N  | 412      | C1CC(NC1)C2=CN=CC=C2                                                       |
| t28  | ornithine                    | AHLPHDHHMVZTML-BYPYZUCNSA-N  | 6262     | C(C[C@@H](C(=O)O)N)CN                                                      |
| t27  | oxoproline                   | ODHCTXKNWHHXJC-VKHYHEASA-N   | 7405     | C1CC(=O)N[C@@H]1C(=O)O                                                     |
| t184 | PC (16:0/9:0(CHO))           | PPTNNIINSOQWCE-WJOKGBTCSA-N  | 46907874 | CCCCCCCCCCCCCCCC(=O)OC[C@H](COP(=O)([O-])OCC[N+](C)(C)C)OC(=O)CCCCCCCC=O   |
| t185 | PC (28:0)                    | CITHEXJVPOWHKC-UUWRZSWSA-N   | 5459377  | CCCCCCCCCCCCCCCC(=O)OC[C@H](COP(=O)([O-])OCC[N+](C)(C)C)OC(=O)CCCCCCCCCCCC |
| t186 | PC (30:0)                    | RFVFAQQWKPSOBED-PSXMRANNSA-N | 129657   | CCCCCCCCCCCCCCCC(=O)O[C@H](COC(=O)CCCCCCCCCCCC)COP(=O)([O-])OCC[N+](C)(C)C |

|      |             |                              |          |                                                                                               |
|------|-------------|------------------------------|----------|-----------------------------------------------------------------------------------------------|
| t187 | PC (30:1)   | ANKCYRKQDLQXGL-MRDDHZETSA-N  | 52922250 | CCCCCCCCCCCCCCCC(=O)O[C@H](COC(=O)CCCCCCC/C=C\CCCC)COP(=O)([O-])OCC[N+](C)(C)C                |
| t188 | PC (31:0)   | NPGWXTIWUUFYAB-DIPNUNPCSA-N  | 24778680 | CCCCCCCCCCCCCCCC(=O)OC[C@H](COP(=O)([O-])OCC[N+](C)(C)C)OC(=O)CCCCCCCCCCCC                    |
| t189 | PC (31:1)   | QFVHCMLUKNHDSH-WTWBAFHPSA-N  | 24778657 | CCCCCCCCCCCCCCCC(=O)OC[C@H](COP(=O)([O-])OCC[N+](C)(C)C)OC(=O)CCCCCCC/C=C\CCCC                |
| t873 | PC (32:0)   | KILNVBDSWZSGLL-KXQOOQHDSA-N  | 452110   | CCCCCCCCCCCCCCCC(=O)OC[C@H](COP(=O)([O-])OCC[N+](C)(C)C)OC(=O)CCCCCCCCCCCC                    |
| t534 | PC (32:1)   | QIBZFHLFHCIUOT-NPBIGWJUSA-N  | 6443788  | CCCCCCCCCCCCCCCC(=O)OC[C@H](COP(=O)([O-])OCC[N+](C)(C)C)OC(=O)CCCCCCC/C=C\CCCC                |
| t192 | PC (32:2)   | GPWHCUUIQMGELX-VHQDNGOZSA-N  | 24778764 | CCCCC/C=C\CCCCCCCC(=O)OC[C@H](COP(=O)([O-])OCC[N+](C)(C)C)OC(=O)CCCCCCC/C=C\CCCC              |
| t193 | PC (32:3)   | UXEFXNOSLOCOLX-ZCHSEWAGSA-N  | 52922763 | CCCCCCCCCCCCCCCC(=O)O[C@H](COC(=O)CCCC/C=C\C/C=C\C/C=C\C/CCC)COP(=O)([O-])OCC[N+](C)(C)C      |
| t194 | PC (33:0)   | FHENRYRLCPXONH-LDLOPFEMSA-N  | 52922645 | CCCCCCCCCCCCCCCC(=O)OC[C@H](COP(=O)([O-])OCC[N+](C)(C)C)OC(=O)CCCCCCCCCCCC                    |
| t196 | PC (33:2)   | SBNDHGBVMZMSNL-UESLNCBNSA-N  | 52922715 | CCCCCCCCCCCCCCCC(=O)O[C@H](COC(=O)CCCCCCC/C=C\C/C=C\C/CCCC)COP(=O)([O-])OCC[N+](C)(C)C        |
| t197 | PC (34:0)   | PZNPLUBHRSSFHT-RRHRGVEJSA-N  | 24778686 | CCCCCCCCCCCCCCCC(=O)O[C@H](COC(=O)CCCCCCCCCCCC)COP(=O)([O-])OCC[N+](C)(C)C                    |
| t874 | PC (34:1)   | WTJKGGKOPKCXLL-VYOBOKEXSA-N  | 5497103  | CCCCCCCCCCCCCCCC(=O)OC[C@H](COP(=O)([O-])OCC[N+](C)(C)C)OC(=O)CCCCCCC/C=C\CCCCCCCC            |
| t875 | PC (34:2)   | JLPULHDHAOZNI-ZTIMHPMXSA-N   | 5287971  | CCCCCCCCCCCCCCCC(=O)OC[C@H](COP(=O)([O-])OCC[N+](C)(C)C)OC(=O)CCCCCCC/C=C\C/C=C\CCCC          |
| t539 | PC (34:3)   | CNNSEHUKQJCGTE-UPPWXJYSA-N   | 24778699 | CCCCCCCCCCCCCCCC(=O)OC[C@H](COP(=O)([O-])OCC[N+](C)(C)C)OC(=O)CCCC/C=C\C/C=C\C/C=C\CCCC       |
| t200 | PC (34:4)   | YWDDIWXXKFJEMKF-JTZVLWBESA-N | 52922891 | CCCCCCCCCCCCCCCC(=O)O[C@H](COC(=O)CCCC/C=C\C/C=C\C/C=C\C/C=C\C/CC)COP(=O)([O-])OCC[N+](C)(C)C |
| t201 | PC (35:1)   | MFHIZGSSDZJFKD-IYEJTHTFSA-N  | 52922679 | CCCCCCCCCCCCCCCC(=O)O[C@H](COC(=O)CCCCCCC/C=C\CCCC)COP(=O)([O-])OCC[N+](C)(C)C                |
| t541 | PC (35:2)   | ZSKWZJYUVZYDQU-WESJWMGVSA-N  | 52922491 | CCCCCCCCCCCCCCCC(=O)OC[C@H](COP(=O)([O-])OCC[N+](C)(C)C)OC(=O)CCCCCCC/C=C\C/C=C\CCCC          |
| t203 | PC (35:2) B | LNGBVAOHJZCRIL-GPDPEMMSA-N   | 52923157 | CCCCCCCCCCCCCCCC(=O)O[C@H](COC(=O)CCCCCCCC/C=C\C/C=C\C/CCC)COP(=O)([O-])OCC[N+](C)(C)C        |
| t204 | PC (35:3)   | AYXGHIQPMDYMIC-AHMBLZLYSA-N  | 52924614 | CCCCCCCCCCCCCCCC(=O)O[C@H](COC(=O)CCCC/C=C\C/C=C\C/C=C\C/C=C\CCCC)COP(=O)(O)OCCN              |
| t205 | PC (35:4)   | OROZWUJCDDCYAU-IPUAOQJZSA-N  | 52922204 | CCCCCCCCCCCC(=O)OC[C@H](COP(=O)([O-])OCC[N+](C)(C)C)OC(=O)CCCC/C=C\C/C=C\C/C=C\C/C=C\CCCC     |

|      |             |                             |          |                                                                                                     |
|------|-------------|-----------------------------|----------|-----------------------------------------------------------------------------------------------------|
| t543 | PC (36:1)   | ATHVAWFAEPLPPQ-VRDBWYNSSA-N | 24778825 | CCCCCCCCCCCCCCCC(=O)OC[C@H](COP(=O)([O-])OCC[N+](C)(C)C)OC(=O)CCCCCCC/C=C\CCCCCCCC                  |
| t876 | PC (36:2)   | SNKAWJBQDLSFF-NVKMUCNASA-N  | 10350317 | CCCCCCCC/C=C\CCCCCCCC(=O)OC[C@H](COP(=O)([O-])OCC[N+](C)(C)C)OC(=O)CCCCCCC/C=C\CCCCCCCC             |
| t545 | PC (36:3)   | YPAZQMWFMRHBBM-CLKMJQEKSA-N | 53478785 | CCCCC/C=C\CCCCCCCC(=O)O[C@H](COC(=O)CCCCCCC/C=C\C/C=C\C\CCCC)COP(=O)([O-])OCC[N+](C)(C)C            |
| t208 | PC (36:3) A | BXRLDROZWDUSGM-ZRYFCQOPSA-N | 24778937 | CCCCCCCC/C=C\CCCCCCCC(=O)OC[C@H](COP(=O)([O-])OCC[N+](C)(C)C)OC(=O)CCCC/C=C\C/C=C\CCCCCCCC          |
| t211 | PC (36:4) A | NKQPOVROGSWLTONVPMBMBSA-N   | 52922783 | CCCCCCCC/C=C\CCCCCCCC(=O)O[C@H](COC(=O)CCCC/C=C\C/C=C\C/C=C\C\CCCC)COP(=O)([O-])OCC[N+](C)(C)C      |
| t212 | PC (36:4) C | IIZPXYDJLKNOIY-JXPJXOSSA-N  | 10747814 | CCCCCCCCCCCCCCCC(=O)OC[C@H](COP(=O)([O-])OCC[N+](C)(C)C)OC(=O)CCC/C=C\C/C=C\C/C=C\C/C=C\CCCC        |
| t548 | PC (36:5)   | DYDDZDMJSQYFGN-OIVUZXIWSA-N | 24778771 | CCCCC/C=C\CCCCCCCC(=O)OC[C@H](COP(=O)([O-])OCC[N+](C)(C)C)OC(=O)CCC/C=C\C/C=C\C/C=C\C/C=C\CCCC      |
| t214 | PC (36:5) B | SUZYROYNFNQALJ-MHEIZRSESA-N | 52923341 | CCCCCCCCCCCCCCCC(=O)O[C@H](COC(=O)CCC/C=C\C/C=C\C/C=C\C/C=C\C\CC)COP(=O)([O-])OCC[N+](C)(C)C        |
| t215 | PC (36:6)   | SPWBDEZMKCRQXS-NGPPOSSDSA-N | 52922847 | CCCC/C=C\C/C=C\C/C=C\CCCC(=O)O[C@H](COC(=O)CCCCCCC/C=C\C/C=C\C/C=C\C\CC)COP(=O)([O-])OCC[N+](C)(C)C |
| t550 | PC (37:2)   | MCZUABDVGPWPM-HJTCUGKVSAN   | 52922735 | CCCCCCCCCCCCCCCC(=O)O[C@H](COC(=O)CCCCCCC/C=C\C/C=C\C\CCCC)COP(=O)([O-])OCC[N+](C)(C)C              |
| t217 | PC (37:3)   | OOYQEEUUQRMQKLJUUDQZDJSAN   | 52922851 | CCCCCCCCCCCCCCCC(=O)O[C@H](COC(=O)CCCCCCC/C=C\C/C=C\C/C=C\C\CC)COP(=O)([O-])OCC[N+](C)(C)C          |
| t218 | PC (37:4)   | QRPUCJXFPYFTMB-FBFLODOBSAN  | 52922853 | CCCCCCCC/C=C\CCCCCCCC(=O)O[C@H](COC(=O)CCCCCCC/C=C\C/C=C\C/C=C\C\CC)COP(=O)([O-])OCC[N+](C)(C)C     |
| t219 | PC (37:5)   | URYYGVMVXBWUJFPLQYSTYLLSAN  | 53478655 | CCCCCCCCCCCCCCCC(=O)OC[C@H](COP(=O)([O-])OCC[N+](C)(C)C)OC(=O)CCCC/C=C\C/C=C\C/C=C\C/C=C\C\CC       |
| t220 | PC (37:6)   | GEINPYKZLFHHILHEXXMCQTSA-N  | 52922342 | CCCCCCCCCCCCCCCC(=O)OC[C@H](COP(=O)([O-])OCC[N+](C)(C)C)OC(=O)CC/C=C\C/C=C\C/C=C\C/C=C\C/C=C\C\CC   |
| t552 | PC (38:2)   | KXXLFCAPKGRXBT-FMJYHZMHSA-N | 24779263 | CCCCCCCCCCCCCCCC(=O)OC[C@H](COP(=O)([O-])OCC[N+](C)(C)C)OC(=O)CCCCCCC/C=C\C/C=C\CCCC                |
| t877 | PC (38:3)   | OJHJKEBRZSDTTLVHWCKNCUSAN   | 52922741 | CCCCCCCC/C=C\CCCCCCCC(=O)O[C@H](COC(=O)CCCCCCC/C=C\C/C=C\C\CCCC)COP(=O)([O-])OCC[N+](C)(C)C         |
| t223 | PC (38:4) A | PSVRFUPOQYJOOZ-QNPWAGBNSAN  | 16219824 | CCCCCCCCCCCCCCCC(=O)OC[C@H](COP(=O)([O-])OCC[N+](C)(C)C)OC(=O)CCC/C=C\C/C=C\C/C=C\CCCC              |
| t224 | PC (38:4) B | DNYKSJQVBCVGOFLCKGXUDJSAN   | 52923291 | CCCCCCCCCCCCCCCC(=O)O[C@H](COC(=O)CCC/C=C\C/C=C\C/C=C\C/C=C\C\CCCC)COP(=O)([O-])OCC[N+](C)(C)C      |
| t553 | PC (38:5)   | YLWBKBDNHWQEFUYJXJLLHLSAN   | 53479033 | CCCCC/C=C\CCCCCCCC(=O)O[C@H](COC(=O)CCC/C=C\C/C=C\C/C=C\C\C\CCCC)COP(=O)([O-])OCC[N+](C)(C)C        |

|      |                            |                              |          |                                                                                                            |
|------|----------------------------|------------------------------|----------|------------------------------------------------------------------------------------------------------------|
| t225 | PC (38:5) A                | SUACBSWYGWBPFC-GPUJSUHJSA-N  | 52923235 | CCCC/C=C\C/C=C\CCCCCCCC(=O)O[C@H](COC(=O)CCCCC/C=C\C/C=C\C/C=C\C\CCCC)COP(=O)([O-])OCC[N+](C)(C)C          |
| t555 | PC (38:6)                  | PLZBTDKJYHXIEW-DZUXOTHRSA-N  | 52923295 | CCCC/C=C\C/C=C\CCCCCCCC(=O)O[C@H](COC(=O)CCC/C=C\C/C=C\C/C=C\C/C=C\C\CCCC)COP(=O)([O-])OCC[N+](C)(C)C      |
| t229 | PC (38:7)                  | BNNUJTATKJXKJP-XCDHYEIIISA-N | 53479075 | CCCC/C=C\C/C=C\C/C=C\CCCC(=O)O[C@H](COC(=O)CCCCC/C=C\C/C=C\C/C=C\C\C\CC)COP(=O)([O-])OCC[N+](C)(C)C        |
| t230 | PC (39:6)                  | QMCWOGICYCFNBF-BWHzRABLSA-N  | 52922637 | CCCC/C=C\C/C=C\C/C=C\C/C=C\CCCC(=O)O[C@H](COC(=O)CCCCC/C=C\C/C=C\C\CCCC)COP(=O)([O-])OCC[N+](C)(C)C        |
| t556 | PC (40:4)                  | QQIYXJBHMDYXHH-NMUBDWGHSA-N  | 52923573 | CCCC/C=C\C/C=C\CCCCCCCCCCCC(=O)OC[C@H](COP(=O)([O-])OCC[N+](C)(C)C)OC(=O)CCCCC/C=C\C/C=C\C\CCCC            |
| t558 | PC (40:5)                  | LJFKFKIYUJNFPZ-ZLFSCUDPSA-N  | 52923133 | CCCCCCCC/C=C\CCCCCCCC(=O)OC[C@H](COP(=O)([O-])OCC[N+](C)(C)C)OC(=O)CCC/C=C\C/C=C\C/C=C\C\C\CCCC            |
| t232 | PC (40:5) A                | IJTJDJOOHZVSAC-NDRUHxFFSA-N  | 53479083 | CCCCCCCC/C=C\CCCCCCCC(=O)O[C@H](COC(=O)CCCCC/C=C\C/C=C\C/C=C\C\C\CC)COP(=O)([O-])OCC[N+](C)(C)C            |
| t233 | PC (40:5) B                | SFESOYFQZQCOY-FXYWPAEZSA-N   | 52923365 | CCCCCCCCCCCCCCCCCCCC(=O)O[C@H](COC(=O)CCC/C=C\C/C=C\C/C=C\C\C/C=C\C\C\CC)COP(=O)([O-])OCC[N+](C)(C)C       |
| t879 | PC (40:6)                  | FYVNIFOYDIODX-KNKJIUSSA-N    | 24778900 | CCCC/C=C\CCCCCCCC(=O)OC[C@H](COP(=O)([O-])OCC[N+](C)(C)C)OC(=O)CCCC/C=C\C/C=C\C/C=C\C/C=C\C\C\CC           |
| t234 | PC (40:6) B                | TYRTWVKQVGNGSZ-RGBTVBCDSA-N  | 52923195 | CCCC/C=C\C/C=C\CCCCCCCC(=O)OC[C@H](COP(=O)([O-])OCC[N+](C)(C)C)OC(=O)CCC/C=C\C/C=C\C/C=C\C\C\CCCC          |
| t560 | PC (40:7)                  | BPUROMFCPFGBOT-ZEGPSQTJSA-N  | 24778982 | CCCC/C=C\C/C=C\CCCCCCCC(=O)OC[C@H](COP(=O)([O-])OCC[N+](C)(C)C)OC(=O)CC/C=C\C/C=C\C/C=C\C\C\C\CCCC         |
| t561 | PC (40:8)                  | BFCSBEFTXQRIQJ-IMYLGooQSA-N  | 53479093 | CC/C=C\C/C=C\C/C=C\C/C=C\CCCC(=O)OC[C@H](COP(=O)([O-])OCC[N+](C)(C)C)OC(=O)CCCCC/C=C\C/C=C\C/C=C\C\C\CC    |
| t237 | PC (42:10)                 | GILJCAGAMFVHNE-QEOLSSISA-N   | 53479133 | CCCC/C=C\C/C=C\C/C=C\C/C=C\C/C=C\C\CCC(=O)O[C@H](COC(=O)CCC/C=C\C/C=C\C\C\C\CC)COP(=O)([O-])OCC[N+](C)(C)C |
| t238 | PC (42:5)                  | APYSSUSAYQRESE-VZWUYPTESA-N  | 52923591 | CCCC/C=C\C/C=C\CCCCCCCCCCCC(=O)OC[C@H](COP(=O)([O-])OCC[N+](C)(C)C)OC(=O)CCCCC/C=C\C/C=C\C\C\CCCC          |
| t239 | PC (42:6)                  | DSVRMAGYENFTLY-GDDYDVMSSA-N  | 52923651 | CCCC/C=C\C/C=C\CCCCCCCC(=O)O[C@H](COC(=O)CCCC/C=C\C/C=C\C/C=C\C\C\CCCC)COP(=O)([O-])OCC[N+](C)(C)C         |
| t562 | PC (o-32:0)                | SVWBXNAUENUONE-LDLOPFEMSA-N  | 173570   | CCCCCCCCCCCCCCCCO[C@H](COC(=O)CCCCCCCCCCCC)COP(=O)([O-])OCC[N+](C)(C)C                                     |
| t241 | PC (o-34:0)                | ZKTXOJMFIAIJG-VQJSHJPSSA-N   | 24779361 | CCCCCCCCCCCCCCCC(=O)OC[C@H](COP(=O)([O-])OCC[N+](C)(C)C)OCCCCCCCCCCCC                                      |
| t563 | PC (p-32:0) or PC (o-32:1) | KEVGQWGWZKFGDC-JCUPVDEDSA-N  | 53478671 | CCCCCCCCCCCCCCCC(=O)OCC(COP(=O)([O-])OCC[N+](C)(C)C)O/C=C\CCCCCCCCCCCC                                     |
| t243 | PC (p-32:1) or PC (o-32:2) | FZMYLOBGNYZPQO-QLSONYGBSA-N  | 52923882 | CCCCCCCCCCCCC/C=C\OC[C@H](COP(=O)([O-])OCC[N+](C)(C)C)OC(=O)CCCCC/C=C\C\CCCC                               |

|      |                              |                              |          |                                                                                                    |
|------|------------------------------|------------------------------|----------|----------------------------------------------------------------------------------------------------|
| t564 | PC (p-34:0) or PC (o-34:1)   | QCGUXAIDEOWPBV-SNKLXRSETSA-N | 53481719 | CCCCCCCCCCCCCCCC(=O)O[C@H](CCCCCCCCCCCC/C=C\CCCCC)COP(=O)([O-])OCC[N+](C)(C)C                      |
| t566 | PC (p-34:1) or PC (o-34:2)   | MBRHHFWRXQYYAN-RTVLTNFHSA-N  | 53480735 | CCCCCCCCCCCCCCCC(=O)OC(CO/C=C\CCCCCCCC/C=C\CCCCC)COP(=O)([O-])OCC[N+](C)(C)C                       |
| t245 | PC (p-34:1) or PC (o-34:2) A | MBRHHFWRXQYYAN-JEPFLRBFSA-N  | 70698781 | CCCCCCCCCCCCCCCC(=O)O[C@H](CO/C=C\CCCCCCCC/C=C\CCCCC)COP(=O)([O-])OCC[N+](C)(C)C                   |
| t246 | PC (p-34:1) or PC (o-34:2) B | KMNVIRCHUMQGHDR-CINKDPXSA-N  | 52923934 | CCCCCCCCCCCCCCCC/C=C\OC[C@H](COP(=O)([O-])OCC[N+](C)(C)C)OC(=O)CCCCCCC/C=C\CCCCC                   |
| t567 | PC (p-34:2) or PC (o-34:3)   | QLEHHUPUHJPURIPWYDUFMYSA-N   | 24779386 | CCCCCCCCCCCCCCCC/C=C\OC[C@H](COP(=O)([O-])OCC[N+](C)(C)C)OC(=O)CCCCCCC/C=C\C/C=C\CCCCC             |
| t568 | PC (p-36:1) or PC (o-36:2)   | ZOTYCHIFTCFAHCKOUVQCMKSA-N   | 53480797 | CCCCCCCCCCCCCCCC(=O)O[C@H](CO/C=C\CCCCC/C=C\CCCCC)COP(=O)([O-])OCC[N+](C)(C)C                      |
| t249 | PC (p-36:1) or PC (o-36:2) B | ZYLPVUZBZNMVMR-ZBBHDILGSA-N  | 52923754 | CCCCCCCCCCCCCCCCOC[C@H](COP(=O)([O-])OCC[N+](C)(C)C)OC(=O)CCCCCCCC/C=C\C/C=C\CCCCC                 |
| t250 | PC (p-36:2) or PC (o-36:3)   | DIHWZUCEXWUHOD-IIVNATNGSA-N  | 53480801 | CCCCCCCC/C=C\CCCCCCCC(=O)O[C@H](CO/C=C\CCCCC/C=C\CCCCCCC)COP(=O)([O-])OCC[N+](C)(C)C               |
| t570 | PC (p-36:3) or PC (o-36:4)   | SOUZQPFUXRVDGK-KCTKZSJBSA-N  | 53481701 | CCCCCCCCCCCCCCCCOC[C@H](COP(=O)([O-])OCC[N+](C)(C)C)OC(=O)CCCCC/C=C\C/C=C\C/C=C\C/C=C\CC           |
| t880 | PC (p-36:4) or PC (o-36:5)   | IOYKZPNDXIIXLN-LOQSCQKMSA-N  | 24779388 | CCCCCCCCCCCCCCCC/C=C\OC[C@H](COP(=O)([O-])OCC[N+](C)(C)C)OC(=O)CCC/C=C\C/C=C\C/C=C\C/C=C\CCCCC     |
| t571 | PC (p-38:3) or PC (o-38:4)   | GWBOVQHRCURSPU-QMFAPAEZSA-N  | 53480815 | CCCCCCCC/C=C\CCCCC/C=C\OC[C@H](COP(=O)([O-])OCC[N+](C)(C)C)OC(=O)CCCCCCCC/C=C\C/C=C\CCCCC          |
| t572 | PC (p-38:4) or PC (o-38:5)   | DBQMOXDLWKVKKG-REWQMPQJSA-N  | 53480761 | CCCCC/C=C\CCCCCCCC/C=C\OC[C@H](COP(=O)([O-])OCC[N+](C)(C)C)OC(=O)CCCCC/C=C\C/C=C\C/C=C\CCCCC       |
| t255 | PC (p-38:4) or PC (o-38:5) A | YPAPIRJFGNBODV-AMFPDOHCSA-N  | 53480715 | CCCCCCCCCCCCCCCC/C=C\OCC(COP(=O)([O-])OCC[N+](C)(C)C)OC(=O)CCCCC/C=C\C/C=C\C/C=C\C/C=C\CC          |
| t256 | PC (p-38:4) or PC (o-38:5) B | DYFGXBAlDOATAE-DSLLYOFSSA-N  | 53480759 | CCCCCCCC/C=C\C/C=C\C/C=C\CCCC(=O)OC(CO/C=C\CCCCCCCC/C=C\C/C=C\CCCC)COP(=O)([O-])OCC[N+](C)(C)C     |
| t573 | PC (p-38:5) or PC (o-38:6)   | ATTCDOPAYPGSLE-LQULQHAGSA-N  | 53479121 | CCCCCCCC/C=C\CCCCC/C=C\OC(COC(=O)CCCCC/C=C\C/C=C\C/C=C\C/C=C\CC)COP(=O)([O-])OCC[N+](C)(C)C        |
| t257 | PC (p-38:5) or PC (o-38:6) A | FAKYQMLQEAQOLK-LHZZQLRFSA-N  | 53480695 | CCCCCCCCCCCCCCCC/C=C\OC[C@H](COP(=O)([O-])OCC[N+](C)(C)C)OC(=O)CC/C=C\C/C=C\C/C=C\C/C=C\CCCCC      |
| t574 | PC (p-40:1) or PC (o-40:2)   | KYEGAYPFBCAHDLS-PACVREBSA-N  | 53480827 | CCCCCCCCCCCCCCCCCCCC(=O)O[C@H](CO/C=C\CCCCC/C=C\CCCC)COP(=O)([O-])OCC[N+](C)(C)C                   |
| t261 | PC (p-40:3) or PC (o-40:4)   | RDNHPNJALITSY-MBZSPAKGSA-N   | 52923852 | CCCCCCCCCCCCCCCCCCCCOC[C@H](COP(=O)([O-])OCC[N+](C)(C)C)OC(=O)CCC/C=C\C/C=C\C/C=C\C/C=C\CCCCC      |
| t262 | PC (p-40:4) or PC (o-40:5)   | UWNFEVACEPZILSRNNLSGHUSA-N   | 52924022 | CCCCCCCCCCCCCCCCCCCC/C=C\OC[C@H](COP(=O)([O-])OCC[N+](C)(C)C)OC(=O)CCC/C=C\C/C=C\C/C=C\C/C=C\CCCCC |

|      |                              |                             |          |                                                                                                       |
|------|------------------------------|-----------------------------|----------|-------------------------------------------------------------------------------------------------------|
| t263 | PC (p-40:5) or PC (o-40:6)   | KUHMJRMPhBRAMY-DDURNVNSA-N  | 53480775 | CCCCC/C=C\CCCCCCC/C=C\OCC(COP(=O)([O-])OCC[N+](C)(C)C)OC(=O)CCCC/C=C\C/C=C\C/C=C\C/C=C\CCCC           |
| t264 | PC (p-40:6) or PC (o-40:7) A | XUVCLJCZWPTAIO-OAKHYACESA-N | 53479405 | CCCCCCCC/C=C\CCCCC/C=C\OC(COC(=O)CCCC/C=C\C/C=C\C/C=C\C/C=C\C/C=C\CC)COP(=O)([O-])OCC[N+](C)(C)C      |
| t265 | PC (p-40:6) or PC (o-40:7) B | FMBYBTSZVHJMV-DIVFMYBRSA-N  | 53479425 | CCCCCCCCCCCCCCCC/C=C\OC(COC(=O)CC/C=C\C/C=C\C/C=C\C/C=C\C/C=C\C/C=C\CC)COP(=O)([O-])OCC[N+](C)(C)C    |
| t267 | PC (p-42:2) or PC (o-42:3)   | ZLQCRABYIDJNLT-AZPQEANBSA-N | 53479549 | CCCCCCCC/C=C\CCCCCCCCCCCC(=O)OCC(COP(=O)([O-])OCC[N+](C)(C)C)O/C=C\CCCCC/C=C\CCCCCCC                  |
| t269 | PC (p-42:4) or PC (o-42:5)   | NLEDXBSUDVLSEN-UFFJXODHSA-N | 52924034 | CCCCCCCCCCCCCCCC/C=C\OC[C@H](COP(=O)([O-])OCC[N+](C)(C)C)OC(=O)CCCC/C=C\C/C=C\C/C=C\C/C=C\CCCC        |
| t270 | PC (p-42:5) or PC (o-42:6) A | QZMFOSCFDWPISC-KQHSIIGPSA-N | 53481769 | CCCC/C=C\C/C=C\C/C=C\CCCCCCCCOC[C@H](COP(=O)([O-])OCC[N+](C)(C)C)OC(=O)CCCCCCCC/C=C\C/C=C\C/C=C\CCCC  |
| t271 | PC (p-42:5) or PC (o-42:6) B | CMUBJJYJAQLOOD-XSOFIKLRSA-N | 52923864 | CCCCCCCCCCCCCCCCCCCCOC[C@H](COP(=O)([O-])OCC[N+](C)(C)C)OC(=O)CC/C=C\C/C=C\C/C=C\C/C=C\C/C=C\C/C=C\CC |
| t272 | PC (p-44:4) or PC (o-44:5)   | CEZAZXUWDFPTE-FHIJHMSSA-N   | 53481767 | CCCC/C=C\C/C=C\CCCCCCCCCCCCOC[C@H](COP(=O)([O-])OCC[N+](C)(C)C)OC(=O)CCCCCCCC/C=C\C/C=C\C/C=C\CCCC    |
| t274 | PE (34:2)                    | HBZNVZIRJWODIB-NHCUFNUSA-N  | 46891780 | CCCCCCCCCCCCCCCC(=O)OC[C@H](COP(=O)([O-])OCC[NH3+])OC(=O)CCCCCCCC/C=C\C/C=C\CCCC                      |
| t275 | PE (36:1)                    | JQKOHZRNEOQNJE-ZZEZOPTASA-N | 25244969 | CCCCCCCCCCCCCCCC(=O)OCC(COP(=O)([O-])OCC[NH3+])OC(=O)CCCCCCCC/C=C\CCCCCCC                             |
| t276 | PE (36:4)                    | KZLUVTCXBFEIFJ-XGLJQOENSA-N | 52924904 | CCCCCCCCCCCCCCCC(=O)OC[C@H](COP(=O)(O)OCCN)OC(=O)CCCC/C=C\C/C=C\C/C=C\C/C=C\CC                        |
| t277 | PE (38:4)                    | ANRKEHNWXKCXDB-BHFWLYLHSA-N | 46891781 | CCCCCCCCCCCCCCCC(=O)OC[C@H](COP(=O)([O-])OCC[NH3+])OC(=O)CCC/C=C\C/C=C\C/C=C\C/C=C\CCCC               |
| t278 | PE (38:6)                    | LFGBKOUQHCWBQI-BZGLIJSBSA-N | 52924893 | CCCC/C=C\C/C=C\CCCCCCCC(=O)OC[C@H](COP(=O)(O)OCCN)OC(=O)CCC/C=C\C/C=C\C/C=C\CCCC                      |
| t279 | PE (p-34:1) or PE (o-34:2)   | SMPXBIVJXNXOAL-PRWZWGSSA-N  | 53479657 | CCCCCCCCCCCCCCCC/C=C\O[C@H](COC(=O)CCCCCCCC/C=C\CCCCCCCC)COP(=O)(O)OCCN                               |
| t281 | PE (p-36:2) or PE (o-36:3)   | CFANDHZPOSNKNO-UDHSZFGOSA-N | 53480897 | CCCCCCCC/C=C\CCCCCCCC(=O)O[C@H](CO/C=C\CCCCC/C=C\CCCCCCC)COP(=O)(O)OCCN                               |
| t282 | PE (p-36:4) or PE (o-36:5)   | ADWDFBQPQIEGRZ-XBICFDGKSA-N | 53480870 | CCCCC/C=C\CCCCCCCC/C=C\OC[C@H](COP(=O)(O)OCCN)OC(=O)CCC/C=C\C/C=C\C/C=C\CCCC                          |
| t283 | PE (p-38:4) or PE (o-38:5)   | ZTZQZGHJLWFLFQ-VZBWJDOASA-N | 53480855 | CCCCCCCCCCCCCCCC/C=C\OC[C@H](COP(=O)(O)OCCN)OC(=O)CCCC/C=C\C/C=C\C/C=C\CC                             |
| t284 | PE (p-38:5) or PE (o-38:6)   | IQSPCSIULMCRPM-ZAJUHDLGSA-N | 53479831 | CCCCCCCC/C=C\CCCCC/C=C\O[C@H](COC(=O)CCCCC/C=C\C/C=C\C/C=C\C/C=C\CC)COP(=O)(O)OCCN                    |
| t286 | PE (p-40:5) or PE (o-40:6)   | HHQFKPJXYWLLJ-ABYSKWQHSA-N  | 53480857 | CCCCCCCCCCCCCCCC/C=C\OC[C@H](COP(=O)(O)OCCN)OC(=O)CC/C=C\C/C=C\C/C=C\C/C=C\CCCC                       |

|      |                 |                             |          |                                                                                          |
|------|-----------------|-----------------------------|----------|------------------------------------------------------------------------------------------|
| t25  | pelargonic acid | FBUKVWPVBMHYJY-UHFFFAOYSA-N | 8158     | CCCCCCCCC(=O)O                                                                           |
| t24  | phenylalanine   | COLNVLDHVKWLRT-QMMMGOBSA-N  | 6140     | C1=CC=C(C=C1)C[C@@H](C(=O)O)N                                                            |
| t23  | phosphate       | NBIIXXVUZAFNBC-UHFFFAOYSA-N | 1004     | OP(=O)(O)O                                                                               |
| t22  | proline         | ONIBWKKTOPOVIA-BYPYZUCNSA-N | 145742   | C1C[C@H](NC1)C(=O)O                                                                      |
| t21  | pseudo-uridine  | PTJWIQPHWPFNBW-GBNDHIKLSA-N | 15047    | C1=C(C(=O)NC(=O)N1)[C@H]2[C@@H]([C@@H]([C@H](O2)CO)O)O                                   |
| t19  | salicylaldehyde | SMQUZDBALVYZAC-UHFFFAOYSA-N | 6998     | C1=CC=C(C=C1)C=O                                                                         |
| t18  | serine          | MTCFGRXMJLQNBG-REOHLBHSAN   | 5951     | C([C@@H](C(=O)O)N)O                                                                      |
| t287 | SM (d30:1)      | HZCLJRFPMKWHR-FEBLJDHQA-N   | 44260123 | CCCCCCCCCCCCC/C=C/[C@H]([C@H](COP(=O)([O-])OCC[N+](C)(C)C)NC(=O)CCCCCCCCCCCC)O           |
| t288 | SM (d32:0)      | MJAFYELZQYPMQG-MPQUPPDSSA-N | 44260138 | CCCCCCCCCCCCCCCC[C@H]([C@H](COP(=O)([O-])OCC[N+](C)(C)C)NC(=O)CCCCCCCCCCCC)O             |
| t289 | SM (d32:1)      | KYICBZWZQPUMOP-SALXKTOSA-N  | 11433862 | CCCCCCCCCCCCC/C=C/[C@H]([C@H](COP(=O)([O-])OCC[N+](C)(C)C)NC(=O)CCCCCCCCCCCC)O           |
| t291 | SM (d33:1)      | LQINJRUGTUOHGS-YPDYIYKJSA-N | 52931139 | CCCCCCCCCCCCCCCC(=O)N[C@@H](COP(=O)([O-])OCC[N+](C)(C)C)[C@@H](/C=C/CCCCCCCCCCCC)O       |
| t292 | SM (d34:0)      | QHZIGNLCLJPLCU-QPPIDDCLSA-N | 9939965  | CCCCCCCCCCCCCCCC[C@H]([C@H](COP(=O)([O-])OCC[N+](C)(C)C)NC(=O)CCCCCCCCCCCC)O             |
| t293 | SM (d34:1)      | RWKUXQNLWDTSLG-GWQJGLRPSA-N | 9939941  | CCCCCCCCCCCCCCCC(=O)N[C@@H](COP(=O)([O-])OCC[N+](C)(C)C)[C@@H](/C=C/CCCCCCCCCCCC)O       |
| t294 | SM (d34:2)      | YLWSJLLZUHSIEA-CKSUKHGVSA-N | 52931235 | CCCCCCCCCCCCCCCC(=O)N[C@@H](COP(=O)([O-])OCC[N+](C)(C)C)[C@@H](/C=C/CCCCCCC/C=C\CCC)O    |
| t295 | SM (d36:0)      | JCELSEVNSMXGKA-IOLBBIBUSA-N | 44260130 | CCCCCCCCCCCCCCCC(=O)N[C@@H](COP(=O)([O-])OCC[N+](C)(C)C)[C@@H](CCCCCCCCCCCC)O            |
| t296 | SM (d36:1)      | LKQLRGMMAHRENYJFYUILSA-N    | 6453725  | CCCCCCCCCCCCCCCC(=O)N[C@@H](COP(=O)([O-])OCC[N+](C)(C)C)[C@@H](/C=C/CCCCCCCCCCCC)O       |
| t297 | SM (d36:2)      | NBEADXWAAWCCDQ-QDDWGVBSA-N  | 6443882  | CCCCCCCCCCCCC/C=C/[C@H]([C@H](COP(=O)([O-])OCC[N+](C)(C)C)NC(=O)CCCCCCC/C=C\CCCCCCC)O    |
| t298 | SM (d36:3)      | YMTVMVYOUDDTQJ-UOMMIRHQA-N  | 52931155 | CCCCCCC/C=C\CCCCCCC(=O)N[C@@H](COP(=O)([O-])OCC[N+](C)(C)C)[C@@H](/C=C/CCCCCCC/C=C\CCC)O |
| t301 | SM (d38:1)      | AADLTHQNYQJHQV-SVLGDMRNSA-N | 44260124 | CCCCCCCCCCCCCCCC(=O)N[C@@H](COP(=O)([O-])OCC[N+](C)(C)C)[C@@H](/C=C/CCCCCCCCCCCC)O       |

|      |               |                              |          |                                                                                                     |
|------|---------------|------------------------------|----------|-----------------------------------------------------------------------------------------------------|
| t302 | SM (d38:2)    | MDRFMTLYKHBJTF-NQYLGBTJSA-N  | 52931179 | CCCCCCCCCCCC/C=C/[C@H]([C@H](COP(=O)([O-])OCC[N+](C)(C)C)NC(=O)CCCCCCCC/C=C\CCCCCCCC)O              |
| t305 | SM (d40:0)    | FONAXCRWZQFJHY-JCGOJSMZSA-N  | 44260132 | CCCCCCCCCCCCCCCCCCCCCCCC(=O)N[C@@H](COP(=O)([O-])OCC[N+](C)(C)C)[C@@H](CCCCCCCCCCCCCCCC)O           |
| t307 | SM (d40:2)    | FOULCGVQZYQEQM-DNXGLLHMSA-N  | 52931201 | CCCCCCCCCCCC/C=C/[C@H]([C@H](COP(=O)([O-])OCC[N+](C)(C)C)NC(=O)CCCCCCCCCCCC/C=C\CCCCCCCC)O          |
| t309 | SM (d41:1)    | SXZWBWNWTCVLZJN-NMIJJABPSA-N | 46891684 | CCCCCCCCCCCCCCCCCCCCCCCC(=O)N[C@@H](COP(=O)([O-])OCC[N+](C)(C)C)[C@@H](/C=C/CCCCCCCCCCCC)O          |
| t310 | SM (d41:2) A  | JBDGKEXQKCCQFK-JWQIMADESA-N  | 52931209 | CCCCCCCCCCCCCCCCCCCCCCCC(=O)N[C@@H](COP(=O)([O-])OCC[N+](C)(C)C)[C@@H](/C=C/CCCCCCCC/C=C\CCC)O      |
| t312 | SM (d42:1)    | QEDPUVGSSDPBMD-XTAIVQBESA-N  | 44260127 | CCCCCCCCCCCCCCCCCCCCCCCC(=O)N[C@@H](COP(=O)([O-])OCC[N+](C)(C)C)[C@@H](/C=C/CCCCCCCCCCCC)O          |
| t314 | SM (d42:2)    | DACOGJMBYLZYDH-GXJPFUDISA-N  | 52931217 | CCCCCCCCCCCCCCCCCCCCCCCC(=O)N[C@@H](COP(=O)([O-])OCC[N+](C)(C)C)[C@@H](/C=C/CCCCCCCC/C=C\CCC)O      |
| t315 | SM (d42:3)    | TXFLWJQVQCDUDZ-BRUGZULGSA-N  | 52931215 | CCCCCCCC/C=C\CCCCCCCCCCCCCCCC(=O)N[C@@H](COP(=O)([O-])OCC[N+](C)(C)C)[C@@H](/C=C/CCCCCCCC/C=C\CCC)O |
| t316 | SM (d43:1)    | LXMARZYBSFYVSY-KUQVZNNZSA-N  | 52931225 | CCCCCCCCCCCCCCCC[C@H]([C@H](COP(=O)([O-])OCC[N+](C)(C)C)NC(=O)CCCCCCCCCCCC/C=C\CCCCCCCC)O           |
| t16  | succinic acid | KDYFGRWQOYBRFD-UHFFFAOYSA-N  | 1110     | C(CC(=O)O)C(=O)O                                                                                    |
| t15  | taurine       | XOAAWQZATWQOTB-UHFFFAOYSA-N  | 1123     | C(CS(=O)(=O)O)N                                                                                     |
| t457 | TG (48:0)     | PVNIQBQSYATKKL-UHFFFAOYSA-N  | 11147    | CCCCCCCCCCCCCCCC(=O)OCC(COC(=O)CCCCCCCCCCCC)OC(=O)CCCCCCCCCCCC                                      |
| t458 | TG (48:1)     | FEKLSEFRUGWUOS-DLOIZKPKSA-N  | 9543986  | CCCCCCCCCCCCCCCC(=O)OC[C@H](COC(=O)CCCCCCC/C=C\CCCC)OC(=O)CCCCCCCCCCCC                              |
| t459 | TG (48:2)     | RUOVJPPUXXFZPC-YZEIBMOJSA-N  | 9543987  | CCCCCCCCCCCCCCCC(=O)OC[C@H](COC(=O)CCCCCCC/C=C\CCCC)OC(=O)CCCCCCC/C=C\CCCC                          |
| t320 | TG (49:0)     | TTWJTJMWHOYBPQ-ANFMRNGASA-N  | 9543988  | CCCCCCCCCCCCCCCC(=O)OC[C@@H](COC(=O)CCCCCCCCCCCC)OC(=O)CCCCCCCCCCCC                                 |
| t460 | TG (49:1)     | VYYGQDOPVVYUKW-UKFBYESTSA-N  | 9543991  | CCCCCCCCCCCCCCCC(=O)OC[C@H](COC(=O)CCCCCCC/C=C\CCCC)OC(=O)CCCCCCCCCCCC                              |
| t322 | TG (49:2)     | QZYSUBAQYSVFNX-PSMULLBHSA-N  | 9543993  | CCCCCCCCCCCCCCCC(=O)OC[C@@H](COC(=O)CCCCCCC/C=C\CCCC)OC(=O)CCCCCCC/C=C\CCCC                         |
| t461 | TG (49:3)     | DIGMYZZFQSIQBD-PNLKURBTSA-N  | 56938088 | CCCCCCCCCCCCCCCC(=O)OC[C@H](COC(=O)CCCCCCC/C=C\C/C=C\CCCC)OC(=O)CCCCCCC/C=C\CCCC                    |
| t462 | TG (50:0)     | MARPCPMDFOPPXX-UHFFFAOYSA-N  | 545588   | CCCCCCCCCCCCCCCC(=O)OCC(COC(=O)CCCCCCCCCCCC)OC(=O)CCCCCCCCCCCC                                      |



|      |           |                                  |          |                                                                                                 |
|------|-----------|----------------------------------|----------|-------------------------------------------------------------------------------------------------|
| t463 | TG (50:1) | YHMDGPZOSGBQRH-<br>YYSBDVFPASA-N | 25240460 | CCCCCCCCCCCCCCCC(=O)OC[C@H](COC(=O)CCCCCCC/C=C\CCCCC<br>CC)OC(=O)CCCCCCCCCCCCCCCC               |
| t464 | TG (50:2) | QEZWFZNHWUARW-<br>XQCAQTCHSA-N   | 9544010  | CCCCCCCCCCCCCCCC(=O)OC[C@@H](COC(=O)CCCCCCC/C=C\CCC<br>CCC)OC(=O)CCCCCCC/C=C\CCCCC              |
| t465 | TG (50:3) | UFHNZOACKFBCOM-<br>YXKNDSBASA-N  | 25240357 | CCCCCCCC/C=C\CCCCCCCC(=O)OC[C@@H](COC(=O)CCCCCCC/C=C\C<br>CCCC)OC(=O)CCCCCCC/C=C\CCCCC          |
| t466 | TG (50:4) | PVMBAGXWHHZKFP-<br>JMPJWMFJSA-N  | 25240359 | CCCCC/C=C\CCCCCCCC(=O)OC[C@H](COC(=O)CCCCCCC/C=C\C/C=C\<br>CCCC)OC(=O)CCCCCCC/C=C\CCCCC         |
| t467 | TG (50:5) | AFTBPUXZTDLRSP-<br>UDQIKIEDSA-N  | 9544045  | CCCCC/C=C\CCCCCCCC(=O)OC[C@H](COC(=O)CCCCCCC/C=C\C/C=C\<br>C/C=C\CC)OC(=O)CCCCCCC/C=C\CCCCC     |
| t468 | TG (51:1) | OZAXLAGNPZMZAD-<br>BOEMPQCLSA-N  | 9544006  | CCCCCCCCCCCCCCCC(=O)OC[C@H](COC(=O)CCCCCCC/C=C\CCCC<br>CC)OC(=O)CCCCCCCCCCCCCCCC                |
| t469 | TG (51:2) | NSNSZGBCOIKUBU-<br>SZOKBDNISA-N  | 9544013  | CCCCCCCCCCCCCCCC(=O)OC[C@H](COC(=O)CCCCCCC/C=C\CCCC<br>CC)OC(=O)CCCCCCC/C=C\CCCCC               |
| t470 | TG (51:3) | ISSGPXMQOMAFMJ-<br>DMGKHJLRSA-N  | 9544023  | CCCCC/C=C\CCCCCCCC(=O)OCC(OC(=O)CCCCCCC/C=C\CCCCC)C<br>OC(=O)CCCCCCC/C=C\CCCCC                  |
| t471 | TG (51:4) | IIRQXNVLAXQEB-<br>KBZCZBDSA-N    | 9544052  | CCCCCCCC/C=C\CCCCCCCC(=O)OC[C@@H](COC(=O)CCCCCCC/C=C\C<br>CCCC)OC(=O)CCCCCCC/C=C\C/C=C\CCCC     |
| t472 | TG (52:0) | SDNYRTVJOFMYIW-<br>OIVUAWODSA-N  | 545690   | CCCCCCCCCCCCCCCC(=O)OC[C@@H](COC(=O)CCCCCCCCCCCCC<br>C)OC(=O)CCCCCCCCCCCCCCCC                   |
| t473 | TG (52:1) | NPCZZYKITFKRQZ-<br>RFBIWTDZSA-N  | 5365005  | CCCCCCCCCCCCCCCC(=O)OC(COC(=O)CCCCCCCCCCCCC)COC(=O)<br>CCCCCCC/C=C\CCCCC                        |
| t474 | TG (52:2) | TXMWKTABZBAJCW-<br>QLHBUVOUSA-N  | 56938176 | CCCCCCCCCCCCCCCC(=O)OC[C@@H](COC(=O)CCCCCCCCCCCC<br>C)OC(=O)CCCCCCC/C=C\C/C=C\CCCC              |
| t475 | TG (52:3) | DQXQIWIQYIEGLG-<br>MMWLGPDSA-N   | 56938177 | CCCCCCCCCCCC(=O)OC[C@H](COC(=O)CCCCCCCC/C=C\CCCCC<br>CC)OC(=O)CCCCCCC/C=C\C/C=C\CCCC            |
| t476 | TG (52:4) | WHSWXEYWNPTUPW-<br>HNJDVRDNSA-N  | 25240364 | CCCCCCC/C=C\CCCCCCCC(=O)O[C@H](COC(=O)CCCCCCC/C=C\CCCC<br>CC)COC(=O)CCCCCCC/C=C\C/C=C\CCCC      |
| t477 | TG (52:5) | CQZAAIKPSLHIBC-<br>KDJOUNIISA-N  | 25240366 | CCCCC/C=C\CCCCCCCC(=O)OC[C@H](COC(=O)CCCCCCC/C=C\C/C=C\<br>CCCC)OC(=O)CCCCCCC/C=C\C/C=C\CCCC    |
| t478 | TG (52:6) | SSOSFUDNINFYLJ-<br>KIYGNKBKSA-N  | 56938180 | CCCCCCCCCCCC(=O)OC[C@H](COC(=O)CCC/C=C\C/C=C\C/C=C\C/C=C<br>C\CCCC)OC(=O)CCCCCCC/C=C\C/C=C\CCCC |
| t479 | TG (53:2) | RSINITWKVQRWSZ-<br>RFVLVDBCSA-N  | 9544102  | CCCCCCCCCCCCCCCC(=O)OC[C@H](COC(=O)CCCCCCC/C=C\C/C=C<br>C\CCCC)OC(=O)CCCCCCCCCCCCCCCC           |
| t480 | TG (53:3) | ZNQBEJYVJSZLM-<br>LEDQTRKSA-N    | 9544126  | CCCCCCC/C=C\CCCCCCCC(=O)OC[C@@H](COC(=O)CCCCCCC/C=C\C<br>CCCC)OC(=O)CCCCCCC/C=C\CCCCC           |
| t324 | TG (53:4) | BMSDHYZLQWTKSQ-<br>LSJAAEOESA-N  | 9544152  | CCCCCCC/C=C\CCCCCCCC(=O)OC[C@@H](COC(=O)CCCCCCC/C=C\C/<br>C=C\CCCC)OC(=O)CCCCCCC/C=C\CCCCC      |

|      |             |                             |          |                                                                                                                     |
|------|-------------|-----------------------------|----------|---------------------------------------------------------------------------------------------------------------------|
| t481 | TG (53:5)   | QHAAATSKYBYSLG-BXDFBOBBSA-N | 9544183  | CCCCCCC/C=C\CCCCCCCC(=O)OC[C@H](COC(=O)CCCCCCC/C=C\C/C=C\CCCC)OC(=O)CCCCCCC/C=C\C/C=C\CCCC                          |
| t483 | TG (54:1)   | YFFIQXNTTVSKJC-NZEOKRFSAN   | 16058371 | CCCCCCCCCCCCCCCCCCCC(=O)OC[C@H](COC(=O)CCCCCCC/C=C\CCCCCCCC)OC(=O)CCCCCCCCCCCCCCCC                                  |
| t484 | TG (54:2)   | WUWGORPQFKFQN-XDVOZUNOSA-N  | 56938183 | CCCCCCCCCCCCCCCCCCCC(=O)OC[C@H](COC(=O)CCCCCCCCCCCC)OC(=O)CCCCCCC/C=C\C/C=C\CCCC                                    |
| t326 | TG (54:3)   | PHYFQTYBJUILEZ-IUPFWZBJSAN  | 5497163  | CCCCCCCC/C=C\CCCCCCCC(=O)OCC(OC(=O)CCCCCCC/C=C\CCCCCCC)COC(=O)CCCCCCC/C=C\CCCCCCCC                                  |
| t329 | TG (54:4)   | BRLGHZXETDWABO-NOFIOOQLSAN  | 9544255  | CCCCCCCCCCCCCCCCCCCC(=O)OC[C@H](COC(=O)CCCCCCC/C=C\C/C=C\C/C=C\C/C=C\CC)OC(=O)CCCCCCC/C=C\CCCCCCCC                  |
| t486 | TG (54:5)   | OEJXMJPFHOYSIU-GRLFFVHSSAN  | 9544294  | CCCCCCCC/C=C\CCCCCCCC(=O)OC[C@H](COC(=O)CCCCCCC/C=C\C/C=C\C/C=C\C/C=C\CC)OC(=O)CCCCCCC/C=C\CCCCCCCC                 |
| t488 | TG (54:6)   | CDNDFDKFZBPPFW-AXJGXPKFSAN  | 9544363  | CCCCCCCC/C=C\CCCCCCCC(=O)O[C@H](COC(=O)CCCCCCC/C=C\CCCCCC)COC(=O)CCC/C=C\C/C=C\C/C=C\C/C=C\C/C=C\CCCC               |
| t489 | TG (54:8)   | BMPVTDWOWBNPJU-NYRSPQLFSAN  | 9544413  | CCCC/C=C\C/C=C\C/C=C\C/C=C\C/C=C\CCCC(=O)OC[C@@H](COC(=O)CCCCCC/C=C\C/C=C\CCCC)OC(=O)CCCCCCC/C=C\C/C=C\CCCC         |
| t490 | TG (56:2)   | PDEQUPGHMOMBFC-FYEHETCMSAN  | 9544390  | CCCCCCCCCCCCCCCCCCCC(=O)OC[C@@H](COC(=O)CCCCCCCCCCCCCCCC)OC(=O)CCCCCCC/C=C\C/C=C\CCCC                               |
| t491 | TG (56:3)   | QXMHHXQBBKSSLBQZNRHJSAN     | 9544447  | CCCCCCCC/C=C\CCCCCCCC(=O)OC[C@@H](COC(=O)CCCCCCC/C=C\CCCCCCCC)OC(=O)CCCCCCC/C=C\CCCCCCCC                            |
| t330 | TG (56:4)   | YONCDTJKIZDSKQ-IYASBODOSAN  | 25240379 | CCCCCCCC/C=C\CCCCCCCC(=O)OC[C@@H](COC(=O)CCCCCCC/C=C\CCCCCCCC)OC(=O)CCCCCCC/C=C\C/C=C\CCCC                          |
| t493 | TG (56:5) A | UHEJWASONFIROS-YPSHDQQVSA-N | 25240380 | CCCCCCCC/C=C\CCCCCCCC(=O)OC[C@@H](COC(=O)CCCCCCC/C=C\C/C=C\CCCC)OC(=O)CCCCCCC/C=C\C/C=C\CCCC                        |
| t494 | TG (56:6)   | ZTNDRFCABXFVMY-WJTCTALZSAN  | 9544625  | CCCC/C=C\C/C=C\CCCCCCCC(=O)OC[C@@H](COC(=O)CCCCCCC/C=C\C/C=C\CCCC)OC(=O)CCCCCCC/C=C\C/C=C\CCCC                      |
| t332 | TG (56:7) B | DODZUDCYRVWEOJ-GKZBLMSTSAN  | 9544695  | CCCC/C=C\C/C=C\CCCCCCCC(=O)OC[C@H](COC(=O)CCCCCCC/C=C\C/C=C\C/C=C\CCCC)OC(=O)CCCCCCC/C=C\C/C=C\CCCC                 |
| t496 | TG (56:8)   | UBGUHMDKDBGQUND-VFWBQFRSAN  | 9544762  | CCCCCCCCCCCCCCCC(=O)OC[C@H](COC(=O)CCC/C=C\C/C=C\C/C=C\C/C=C\CCCC)OC(=O)CCC/C=C\C/C=C\C/C=C\C/C=C\CCCC              |
| t498 | TG (58:1)   | OWZMHFAFGQCCNIFBXRAONGSAN   | 25240381 | CCCCCCCCCCCCCCCCCCCC(=O)OC[C@@H](COC(=O)CCCCCCC/C=C\C/C=C\CCCC)OC(=O)CCCCCCCCCCCCCCCC                               |
| t497 | TG (58:10)  | GXWBCAVCOMAHTVMCJOIRWSAN    | 9545277  | CCCC/C=C\C/C=C\CCCCCCCC(=O)OC[C@H](COC(=O)CCC/C=C\C/C=C\C/C=C\C/C=C\C/C=C\CCCC)OC(=O)CCC/C=C\C/C=C\C/C=C\C/C=C\CCCC |
| t499 | TG (58:6)   | GSNFRUMSEHHPSY-LXCSEBNSAN   | 9544977  | CCCCCCCC/C=C\CCCCCCCC(=O)O[C@H](COC(=O)CCCCCCC/C=C\CCCCCCCC)COC(=O)CCC/C=C\C/C=C\C/C=C\C/C=C\CCCC                   |
| t336 | TG (58:8)   | KWIGMCRWEINBIRHUPVKWKYSAN   | 9545124  | CCCCCCCCCCCCCCCCCCCC(=O)OC[C@H](COC(=O)CCC/C=C\C/C=C\C/C=C\C/C=C\C/C=C\CCCC)OC(=O)CCC/C=C\C/C=C\C/C=C\C/C=C\CCCC    |

|      |                        |                             |         |                                                                                                                 |
|------|------------------------|-----------------------------|---------|-----------------------------------------------------------------------------------------------------------------|
| t500 | TG (58:9)              | RVXFSLZMZOFGEQ-SWIIBWKZSA-N | 9545200 | CCCCCCCC/C=C\CCCCCCCC(=O)OC[C@H](COC(=O)CCC/C=C\C/C=C\C/C=C\C/C=C\C\CCCC)OC(=O)CCC/C=C\C/C=C\C/C=C\C/C=C\C\CCCC |
| t14  | threitol               | UNXHWFMMPAWVPI-QWWZWVQMSA-N | 169019  | C([C@H]([C@@H](CO)O)O)O                                                                                         |
| t13  | threonic acid          | JPIJQSOTBSSVTP-STHAYSLISA-N | 5460407 | C([C@@H]([C@H](C(=O)O)O)O)O                                                                                     |
| t12  | threonine              | AYFVYJQAPQTCCC-GBXIJSLSA-N  | 6288    | C[C@H]([C@@H](C(=O)O)N)O                                                                                        |
| t11  | tocopherol alpha-      | NCYCYZXNIZJOKI-OVSJKPMPA-N  | 638015  | CC1=C(C(CCC1)(C)C)/C=C/C(=C/C=C/C(=C/C=O)/C)/C                                                                  |
| t10  | tocopherol gamma-      | QUEDXNHFTDJVIY-DQCZWHMSA-N  | 92729   | CC1=C(C=C2CC[C@@](OC2=C1C)(C)CCC[C@H](C)CCC[C@H](C)CCCC(C)C)O                                                   |
| t9   | trans-4-hydroxyproline | PMMYEEVYMWASQN-DMTCNVIQSA-N | 5810    | C1[C@H](CN[C@@H]1C(=O)O)O                                                                                       |
| t8   | tryptophan             | QIVBCDIJAJPQS-VIFPVBQESA-N  | 6305    | C1=CC=C2C(=C1)C(=CN2)C[C@@H](C(=O)O)N                                                                           |
| t7   | tyrosine               | OUYCCASQSFEME-QMMMGPBSA-N   | 6057    | C1=CC(=CC=C1C[C@@H](C(=O)O)N)O                                                                                  |
| t6   | urea                   | XSQUKJJFZCRTK-UHFFFAOYSA-N  | 1176    | C(=O)(N)N                                                                                                       |
| t5   | uric acid              | LEHOTFFKMJEONL-UHFFFAOYSA-N | 1175    | C12=C(NC(=O)N1)NC(=O)NC2=O                                                                                      |
| t4   | uridine                | DRTQHJPVMGBUCF-XVFCMESISA-N | 6029    | C1=CN(C(=O)NC1=O)[C@H]2[C@@H]([C@@H]([C@H](O2)CO)O)O                                                            |
| t3   | valine                 | KZSNJWFQEVHDMF-BYPYZUCNSA-N | 6287    | CC(C)[C@@H](C(=O)O)N                                                                                            |
| t2   | xanthine               | LRFVTYWOQMYALW-UHFFFAOYSA-N | 1188    | C1=NC2=C(N1)C(=O)NC(=O)N2                                                                                       |
| t1   | xylulose               | LQXVFWRQNMEDEE-PYHARJCCSA-N | 439205  | C1[C@@H]([C@H](C(O1)(CO)O)O)O                                                                                   |

**Supplemental Table 2: Proportion and amount of subjects eating any amount of food subgroups among TEDDY mAb+ cases and matched controls with metabolomics at 9 months and seroconversion**

| Food groups (bold) and subgroups                                     | Infancy 9-months (n=530) |            |             |
|----------------------------------------------------------------------|--------------------------|------------|-------------|
|                                                                      | n Consumers              | Mean g/day | % Consumers |
| <b>BREAST MILK</b>                                                   | 229                      | 345.19     | 43.2        |
| <b>CEREALS</b>                                                       |                          |            |             |
| Gluten-containing cereals (wheat, rye, barley)                       | 469                      | 15.56      | 88.5        |
| Gluten-free cereals (rice, oats, corn, other GF flours and starches) | 524                      | 30.81      | 98.9        |
| <b>FRUIT AND BERRIES</b>                                             |                          |            |             |
| Apple                                                                | 364                      | 44.02      | 68.7        |
| Berries                                                              | 253                      | 20.63      | 47.7        |
| Citrus                                                               | 20                       | 17.59      | 3.8         |
| Other fresh fruits                                                   | 484                      | 59.48      | 91.3        |
| Processed fruits (canned and dried)                                  | 268                      | 31.70      | 50.6        |
| <b>FRUIT, BERRY, VEGETABLE JUICES</b>                                |                          |            |             |
| Apple Juice                                                          | 183                      | 22.14      | 34.5        |
| Berry Juice                                                          | 8                        | 16.89      | 1.5         |
| Citrus Juice                                                         | 149                      | 7.43       | 28.1        |
| Other fruit juices                                                   | 205                      | 15.27      | 38.7        |
| Mixed Fruit, Fruit/Vegetables, Vegetables Juices                     | 74                       | 34.64      | 14.0        |
| <b>VEGETABLES</b>                                                    |                          |            |             |
| Potatoes                                                             | 416                      | 54.60      | 78.5        |
| Roots, Sweet Potatoes                                                | 488                      | 39.26      | 92.1        |
| Leafy Vegetables (and Cabbage)                                       | 266                      | 19.05      | 50.2        |
| Fruit Vegetables                                                     | 391                      | 30.38      | 73.8        |
| Onions                                                               | 296                      | 8.17       | 55.9        |
| Legumes                                                              | 241                      | 24.85      | 45.5        |
| Processed Vegetables                                                 | 237                      | 15.68      | 44.7        |
| Soy                                                                  | 29                       | 15.15      | 5.5         |
| <b>NUTS, SEEDS</b>                                                   | 43                       | 0.89       | 8.1         |
| <b>FATS AND OILS</b>                                                 |                          |            |             |
| Vegetables Oils                                                      | 432                      | 7.99       | 81.5        |
| Saturated Fats (solid vegetable, animal fats)                        | 251                      | 2.13       | 47.4        |
| Low-Fat Butter/Margarine                                             | 42                       | 4.83       | 7.9         |
| High-Fat Butter/Margarine                                            | 163                      | 3.62       | 30.8        |
| <b>MILK AND MILK PRODUCTS</b>                                        |                          |            |             |

|                               |     |        |      |
|-------------------------------|-----|--------|------|
| Fat-free milk                 | 252 | 58.40  | 47.6 |
| Milk                          | 195 | 224.12 | 36.8 |
| Creams                        | 124 | 7.25   | 23.4 |
| Ice cream                     | 15  | 10.73  | 2.8  |
| Sour Milk                     | 193 | 50.47  | 36.4 |
| Cheese                        | 178 | 9.42   | 33.6 |
| <b>NON-DAIRY PRODUCTS</b>     | 2   | 13.00  | 0.4  |
| <b>MEAT AND MEAT PRODUCTS</b> |     |        |      |
| Red Meat                      | 368 | 26.39  | 69.4 |
| Poultry                       | 300 | 19.50  | 56.6 |
| Processed Meats               | 67  | 22.10  | 12.6 |
| <b>FISH AND FISH PRODUCTS</b> | 134 | 18.67  | 25.3 |
| <b>EGGS</b>                   | 102 | 8.08   | 19.3 |
| <b>BEVERAGES</b>              |     |        |      |
| Other Beverages               | 32  | 75.84  | 6.0  |
| Sugar-Sweetened Beverages     | 90  | 39.77  | 17.0 |
| Alcohol                       | 0   | .      | 0.0  |
| <b>CONFECTIONARY</b>          | 10  | 11.27  | 1.9  |
| <b>INFANT FORMULAS</b>        | 259 | 523.18 | 48.9 |
| <b>MISCELLANEOUS</b>          | 10  | 6.45   | 1.9  |

**Supplemental Table 3: Characteristics and outcomes of TEDDY nested case-control 1:3 matched study at seroconversion**

|                               | Outcomes   |            |           |            |
|-------------------------------|------------|------------|-----------|------------|
|                               | IA         | IAA        | GADA      | mAb+       |
| Matching Characteristic       | n (%)      | n (%)      | n (%)     | n (%)      |
| <b>Clinical Center</b>        |            |            |           |            |
| Colorado                      | 51 (14.5)  | 22 (12.9)  | 17 (15.0) | 30 (14.2)  |
| Georgia                       | 28 (8.0)   | 8 (4.7)    | 12 (10.6) | 18 (8.5)   |
| Washington                    | 32 (9.1)   | 16 (9.4)   | 14 (12.4) | 15 (7.1)   |
| Finland                       | 100 (28.4) | 59 (34.5)  | 23 (20.4) | 72 (34.1)  |
| Germany                       | 28 (8.0)   | 11 (6.4)   | 9 (8.0)   | 16 (7.6)   |
| Sweden                        | 113 (32.1) | 55 (32.2)  | 38 (33.6) | 60 (28.4)  |
| <b>Sex</b>                    |            |            |           |            |
| Female                        | 158 (44.9) | 71 (41.5)  | 56 (49.6) | 91 (43.1)  |
| Male                          | 194 (55.1) | 100 (58.5) | 57 (50.4) | 120 (56.9) |
| <b>FDR/GP Status</b>          |            |            |           |            |
| First Degree Relative         | 79 (22.4)  | 37 (21.6)  | 27 (23.9) | 53 (25.1)  |
| General Population            | 273 (77.6) | 134 (78.4) | 86 (76.1) | 158 (74.9) |
| <b>Long Distance Protocol</b> |            |            |           |            |
| Yes                           | 43 (12.2)  | 17 (9.9)   | 16 (14.2) | 24 (11.4)  |
| No                            | 309 (87.8) | 154 (90.1) | 97 (85.8) | 187 (88.6) |

**Supplemental Figure 2: Volcano plots of the association between 853 metabolites measured at seroconversion, pre-seroconversion, and 9-months and development of islet autoimmunity (IA), multiple autoantibody positivity (mAb+), IAA, and GADA in the TEDDY study.**

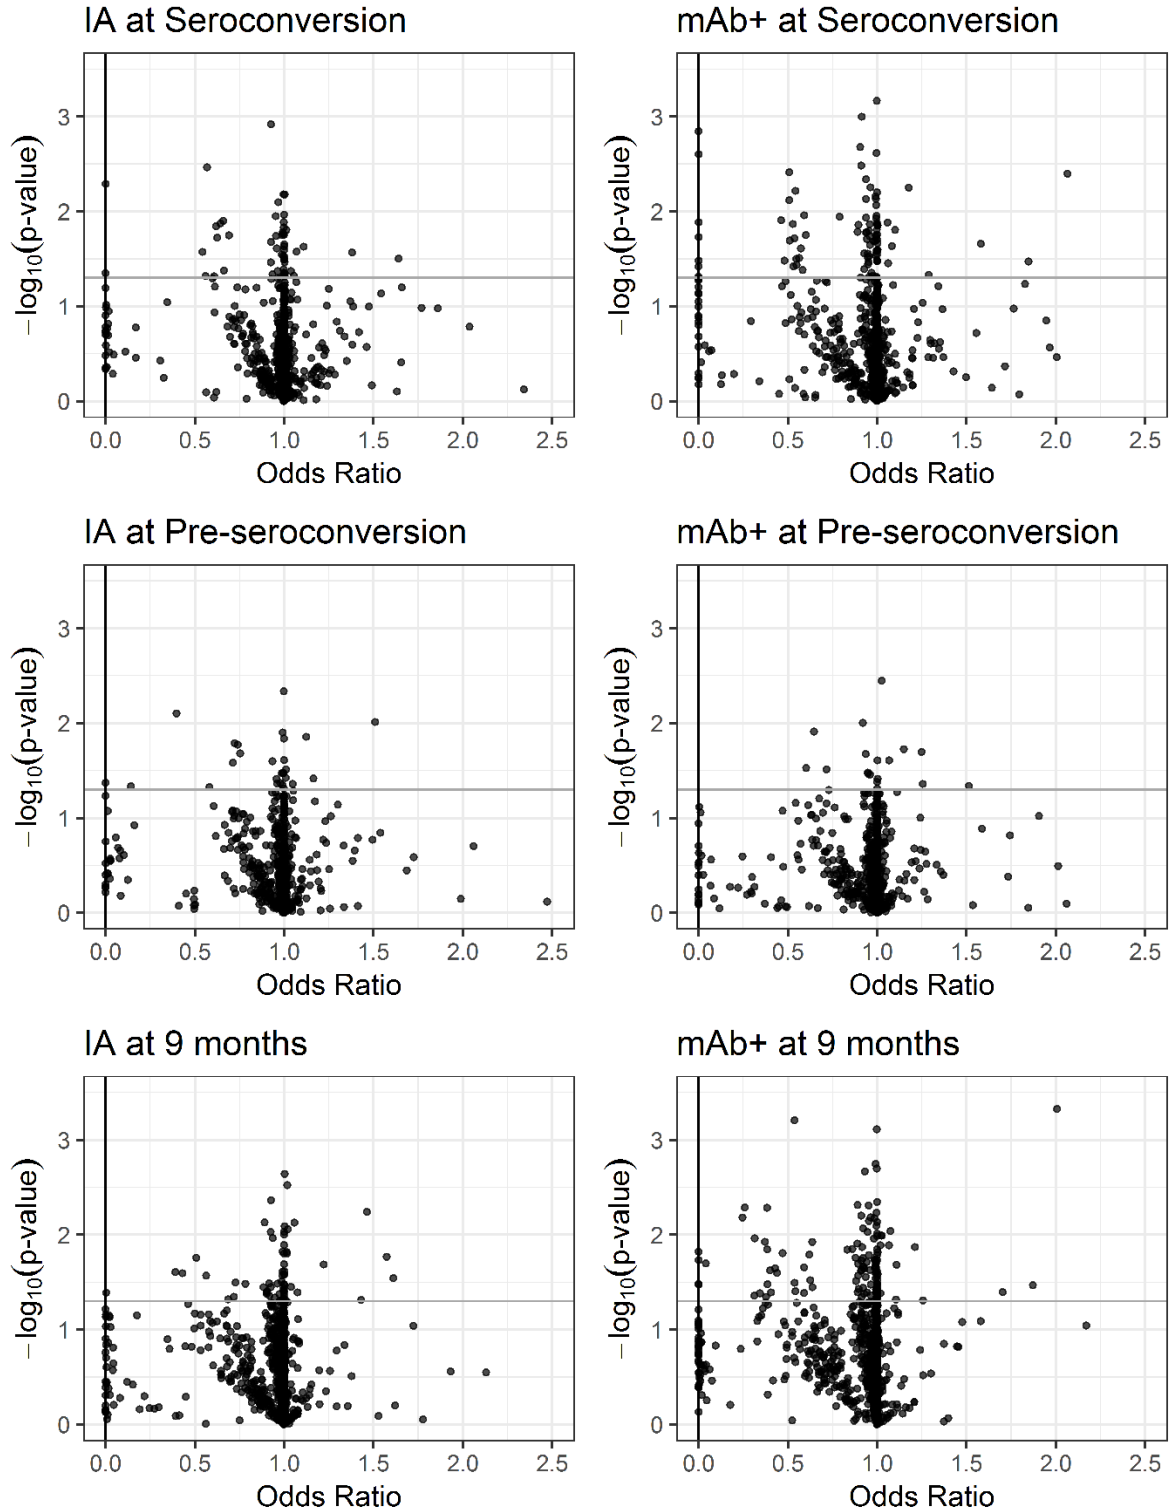

IAA at Seroconversion

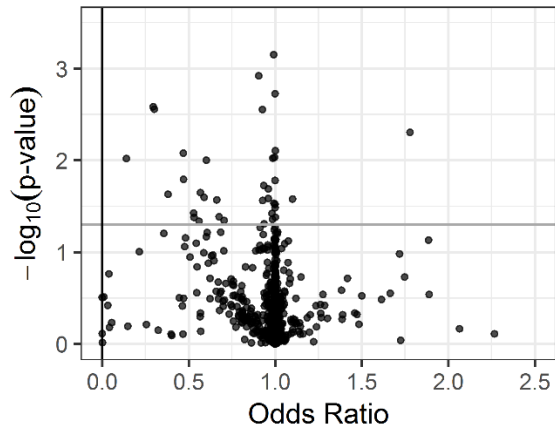

GADA at Seroconversion

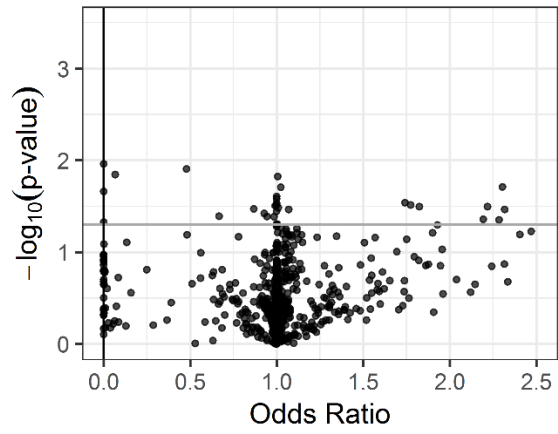

IAA at Pre-seroconversion

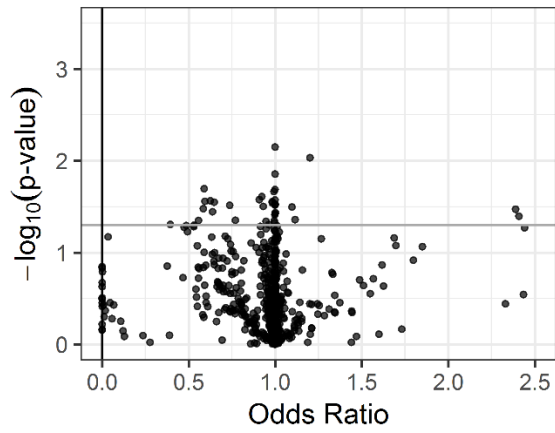

GADA at Pre-seroconversion

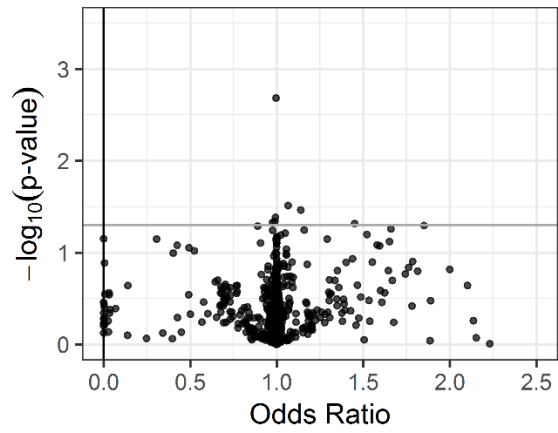

IAA at 9 months

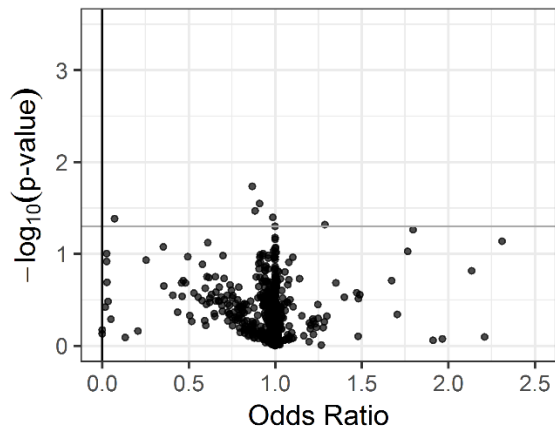

GADA at 9 months

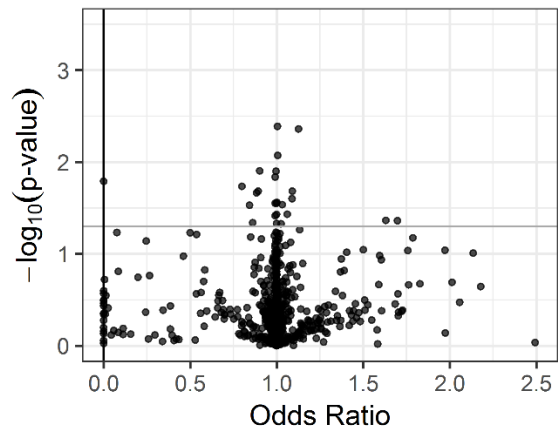



**Supplemental Table 4: ChemRICH summary of chemically similar metabolite groups significantly associated with mAb+ (nominal p-value for group<0.05)**

| Metabolite Groups                |         | Seroconversion |         |         |         | Pre-seroconversion |         |         |         | Infancy    |         |         |         |
|----------------------------------|---------|----------------|---------|---------|---------|--------------------|---------|---------|---------|------------|---------|---------|---------|
|                                  |         | Metabolite     |         | Group   |         | Metabolite         |         | Group   |         | Metabolite |         | Group   |         |
| Name                             | Total p | p, p<0.05      | p, OR<1 | p-value | q-value | p, p<0.05          | p, OR<1 | p-value | q-value | p, p<0.05  | p, OR<1 | p-value | q-value |
| Unsaturated Phosphatidylcholines | 76      | 5              | 3       | 2.1E-05 | 0.0003  | 2                  | 1       | 0.013   | 0.35    | 29         | 28      | 2.2E-20 | 6.6E-19 |
| Sphingomyelins                   | 16      |                |         |         |         |                    |         |         |         | 10         | 10      | 1.1E-08 | 1.6E-07 |
| Phosphatidylethanolamines        | 10      | 3              | 3       | 0.0047  | 0.042   |                    |         |         |         | 3          | 3       | 2.9E-06 | 2.9E-05 |
| Galactosylceramides              | 4       |                |         |         |         |                    |         |         |         | 2          | 2       | 4.4E-05 | 0.00033 |
| Dicarboxylic Acids               | 5       |                |         |         |         |                    |         |         |         | 3          | 0       | 0.0019  | 0.012   |
| Phospholipid Ethers              | 6       |                |         |         |         |                    |         |         |         | 2          | 2       | 0.0032  | 0.016   |
| Unsaturated Triglycerides        | 43      | 17             | 15      | 3.1E-15 | 9E-14   |                    |         |         |         |            |         |         |         |
| Amino Acids                      | 6       | 2              | 2       | 0.0074  | 0.042   |                    |         |         |         |            |         |         |         |
| Saturated FA                     | 7       | 3              | 0       | 0.0074  | 0.042   |                    |         |         |         |            |         |         |         |
| Diglycerides                     | 11      | 3              | 3       | 0.014   | 0.064   |                    |         |         |         |            |         |         |         |
| Amino Acids, Aromatic            | 4       | 2              | 2       | 0.03    | 0.12    |                    |         |         |         |            |         |         |         |

*ChemRICH inputs: p-value and OR=Odds Ratio from conditional logistic regression models adjusted for HLA (DR3/4) and age at blood draw date  
p=number of metabolites*

**Supplemental Table 5: Correlation between key metabolites and dietary pattern scores in infancy.**

|                            | Metabolite-related dietary patterns |         |          |         |          |         |
|----------------------------|-------------------------------------|---------|----------|---------|----------|---------|
|                            | 1                                   |         | 2        |         | 3        |         |
|                            | r                                   | p-value | r        | p-value | r        | p-value |
| PC (34:3)                  | 0.1275                              | 0.0033  | 0.07447  | 0.0871  | 0.30464  | <.0001  |
| SM (d41:2) A               | 0.0415                              | 0.3408  | 0.17774  | <.0001  | -0.07351 | 0.0912  |
| PE (34:2)                  | 0.38408                             | <.0001  | 0.10781  | 0.0131  | -0.02897 | 0.5062  |
| GlcCer (d41:1)             | -0.12619                            | 0.0036  | 0.25199  | <.0001  | -0.06429 | 0.1397  |
| Adipic acid                | 0.00103                             | 0.9812  | -0.01747 | 0.6884  | 0.00241  | 0.9559  |
| PC (p-32:0) or PC (o-32:1) | -0.12968                            | 0.0028  | 0.22418  | <.0001  | 0.16656  | 0.0001  |

*r*=Pearson correlation coefficient

**Supplemental Table 6: Cohort characteristics of TEDDY children with food records at age 9-months**

|                        | mAb+ by age 6 yr |           | mAb- at age 6 yr |           | p-value        |
|------------------------|------------------|-----------|------------------|-----------|----------------|
|                        | n                | %         | n                | %         |                |
| Total Subjects         | 300              |           | 6237             |           |                |
| Clinical Center        |                  |           |                  |           | 0.196          |
| Colorado               | 52               | 17.33     | 987              | 15.82     |                |
| Georgia                | 25               | 8.33      | 638              | 10.23     |                |
| Washington             | 29               | 9.67      | 837              | 13.42     |                |
| Finland                | 77               | 25.67     | 1406             | 22.54     |                |
| Germany                | 23               | 7.67      | 365              | 5.85      |                |
| Sweden                 | 94               | 31.33     | 2004             | 32.13     |                |
| Female                 | 139              | 46.33     | 3075             | 49.3      | 0.315          |
| First degree relative  | 71               | 23.67     | 613              | 9.83      | <0.001         |
| HLA-DR3/4              | 169              | 56.33     | 2354             | 37.74     | <0.001         |
|                        | <b>Mean</b>      | <b>SD</b> | <b>Mean</b>      | <b>SD</b> | <b>p-value</b> |
| Age at first Ab (days) | 990.1            | 517.3     | --               |           |                |
| Dietary Pattern Scores |                  |           |                  |           |                |
| 1                      | -0.055           | 1.07      | 0.004            | 0.98      | 0.349          |
| 2                      | -0.076           | 0.88      | 0.005            | 0.93      | 0.120          |
| 3                      | 0.082            | 1.06      | 0.008            | 1.04      | 0.238          |
